# Supplementary material for: Selective and comprehensive characterization of the quinochalcone C-glycoside homologs in Carthamus tinctorius L. by offline comprehensive two-dimensional liquid chromatography/LTQ-Orbitrap MS coupled with versatile data mining strategies
Source: Royal Society of Chemistry journal article supplement (doi:10.1039/c5ra23744k), 2015-12-15
Supplement: c5ra23744k1.pdf [file c5ra23744k1.pdf]

**Electronic Supplementary Information (ESI)**

**Selective and comprehensive characterization of the quinochalcone  
C-glycoside homologs in *Carthamus tinctorius* L. by offline  
comprehensive two-dimensional liquid  
chromatography/LTQ-Orbitrap MS coupled with versatile data  
mining strategies**

Wenzhi Yang,<sup>‡a</sup> Wei Si,<sup>‡a</sup> Jingxian Zhang,<sup>a</sup> Min Yang,<sup>a</sup> Huiqin Pan,<sup>a</sup> Jia Wu,<sup>a</sup> Shi Qiu,<sup>a</sup>  
Changliang Yao,<sup>a</sup> Jinjun Hou,<sup>a</sup> Wanying Wu<sup>a</sup> and Dean Guo<sup>a</sup>

<sup>a</sup> *Shanghai Research Center for Modernization of Traditional Chinese Medicine,  
National Engineering Laboratory for TCM Standardization Technology, Shanghai  
Institute of Materia Medica, Chinese Academy of Sciences, 501 Haik Road,  
Shanghai 201203, China. E-mail addresses: wanyingwu@simm.ac.cn (W.-Y. Wu),  
[daguo@simm.ac.cn](mailto:daguo@simm.ac.cn) (D.-A. Guo); Fax: +86-21-50272789; Tel.:  
+86-21-20231000x2221.*

## Contents

**Text** Column selection for the first dimensional (<sup>1</sup>D) and the second dimensional (<sup>2</sup>D) separations

**Fig. S1** Structures of 21 known quinochalcone C-glycosides previously isolated from *Carthamus tinctorius* L..

**Fig. S2** Comparison of five different RP stationary phases on the selectivity of *C. tinctorius* components. Data were acquired on a Waters UPLC/QTOF instrument.

**Fig. S3** The <sup>1</sup>D HILIC separation of *C. tinctorius* components using different mobile phases. AF, ammonium formate; FA, formic acid. Data were acquired on a Waters UPLC/QTOF instrument.

**Fig. S4** Comparison of the addition of different concentrations of ammonium formate (AF) in the mobile phase on the separation of *C. tinctorius* components.

**Fig. S5** A precision test of the <sup>1</sup>D HILIC method (n=6).

**Fig. S6** Comparison of different column temperature on the <sup>2</sup>D separation of *C. tinctorius* components.

**Fig. S7** The proposed fragmentation pathways for HSYA based on the negative mode CID-MS<sup>3</sup> data obtained on an LTQ-Orbitrap hybrid mass spectrometer.

**Fig. S8** The CID-MS<sup>3</sup> and HCD-MS/MS spectra and proposed fragmentation pathways for ISC.

**Fig. S9** The proposed fragmentation pathways for AnHSYB based on the negative mode CID-MS<sup>3</sup> and HCD-MS/MS data obtained on an LTQ-Orbitrap hybrid mass spectrometer.

**Table S1** Detailed information with respect to the 163 quinochalcone C-glycoside compounds characterized from *C. tinctorius* by the offline comprehensive 2D LC and high-resolution LTQ-Orbitrap MS analysis.

***Column selection for the first dimensional (<sup>1</sup>D) and the second dimensional (<sup>2</sup>D) separations***

RPLC was primarily selected for the <sup>2</sup>D separation. Five columns of the RP separation mechanism were tested, comprising BEH C18 (2.1 × 100 mm, 1.7 μm; Waters, Milford, MA, USA), HSS T3 (2.1 × 100 mm, 1.8 μm; Waters), BEH Shield RP-18 (2.1 × 100 mm, 1.7 μm; Waters), Zorbax SB (2.1 × 100 mm, 1.8 μm; Agilent, Waldbronn, Germany), and Zorbax SB-Aq (2.1 × 100 mm, 1.8 μm; Agilent). Afterwards, the columns of versatile separation mechanisms or with different bonding groups were examined to compare the separation difference (orthogonality) compared with the selected <sup>2</sup>D column. The candidate columns tested for the <sup>1</sup>D separation included XBridge Amide (4.6 × 150 mm, 3.5 μm; Waters) and Acchrom XAmide (4.6 × 150 mm, 5 μm; Acchrom, Beijing, China) of the HILIC mode, the RP columns bonded with different hydrophobic groups, BEH Phenyl (2.1 × 100 mm, 1.7 μm; Waters), HSS PFP (2.1 × 100 mm, 1.8 μm; Waters), CSH Phenyl-Hexyl (2.1 × 100 mm, 1.7 μm; Waters), and a cyano column Xselect HSS Cyano (2.1 × 100 mm, 1.8 μm; Waters). The separation differentiation amongst different column combinations was evaluated by comparing the linearity aggression correlation coefficient ( $R^2$ ) of the distribution of fifteen major *C. tinctorius* components.

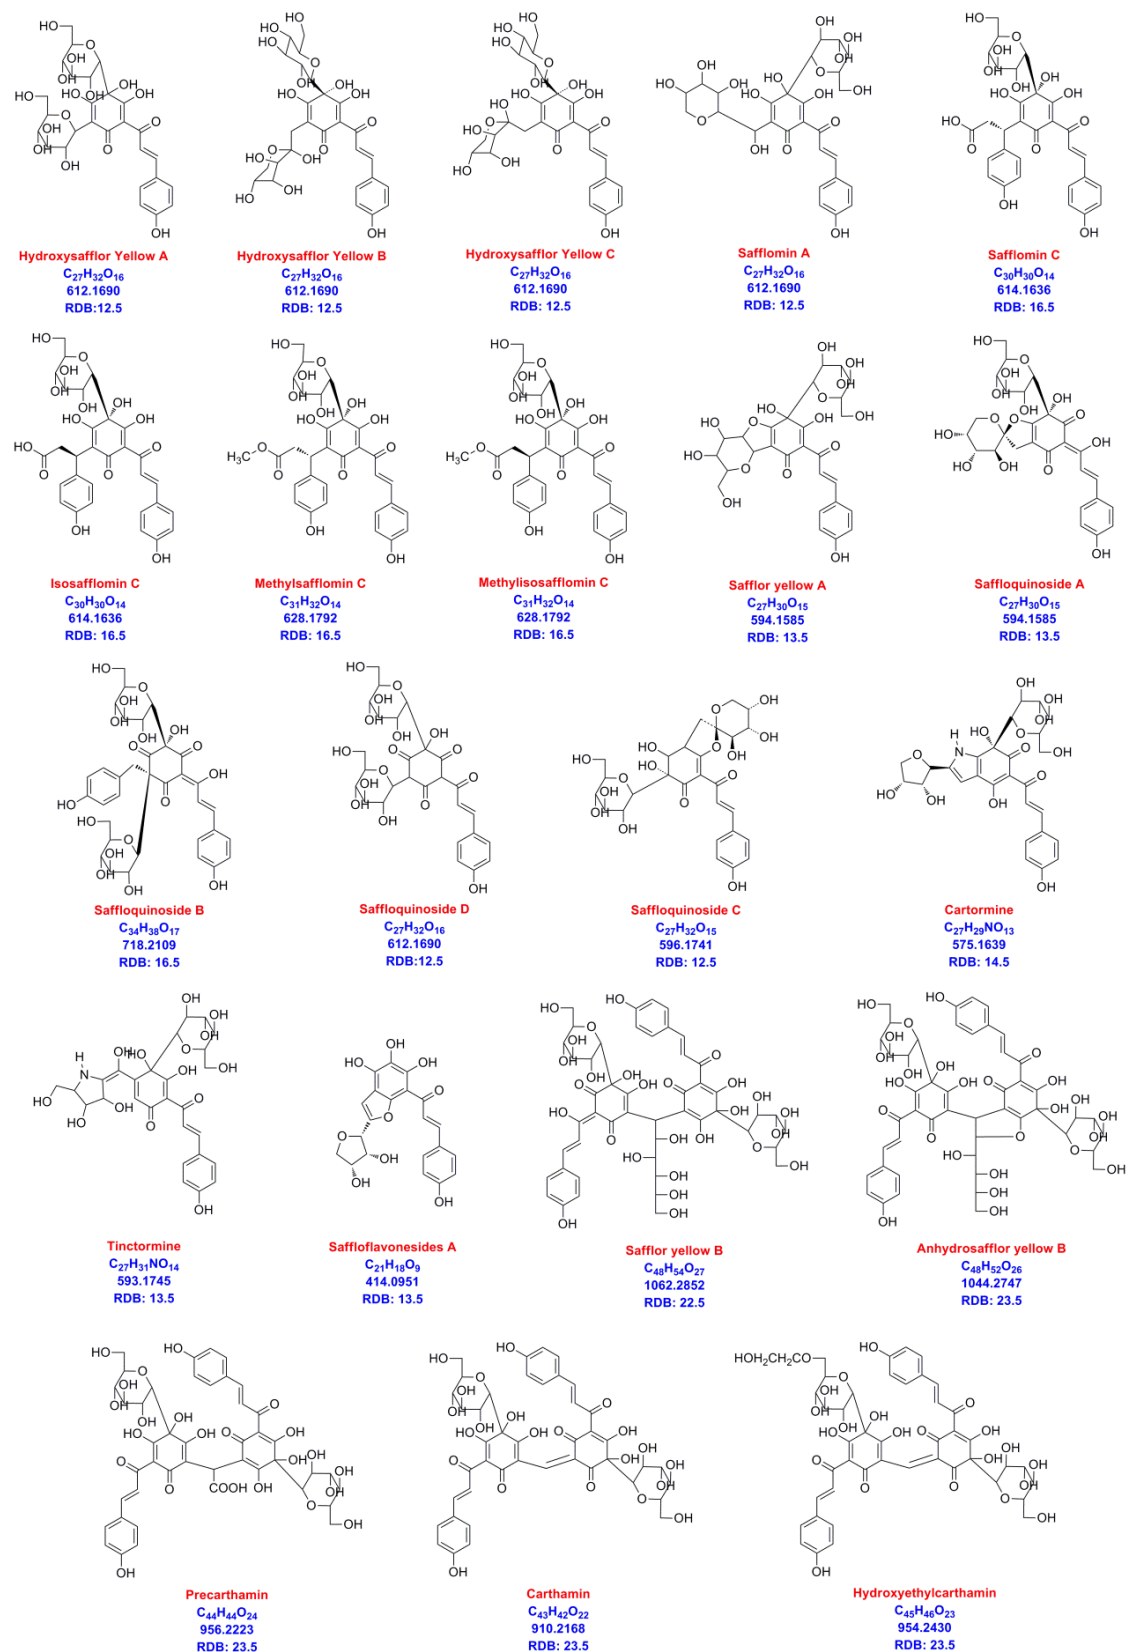

**Fig. S1** Structures of 21 known quinochalcone C-glycosides previously isolated from *Carthamus tinctorius* L..

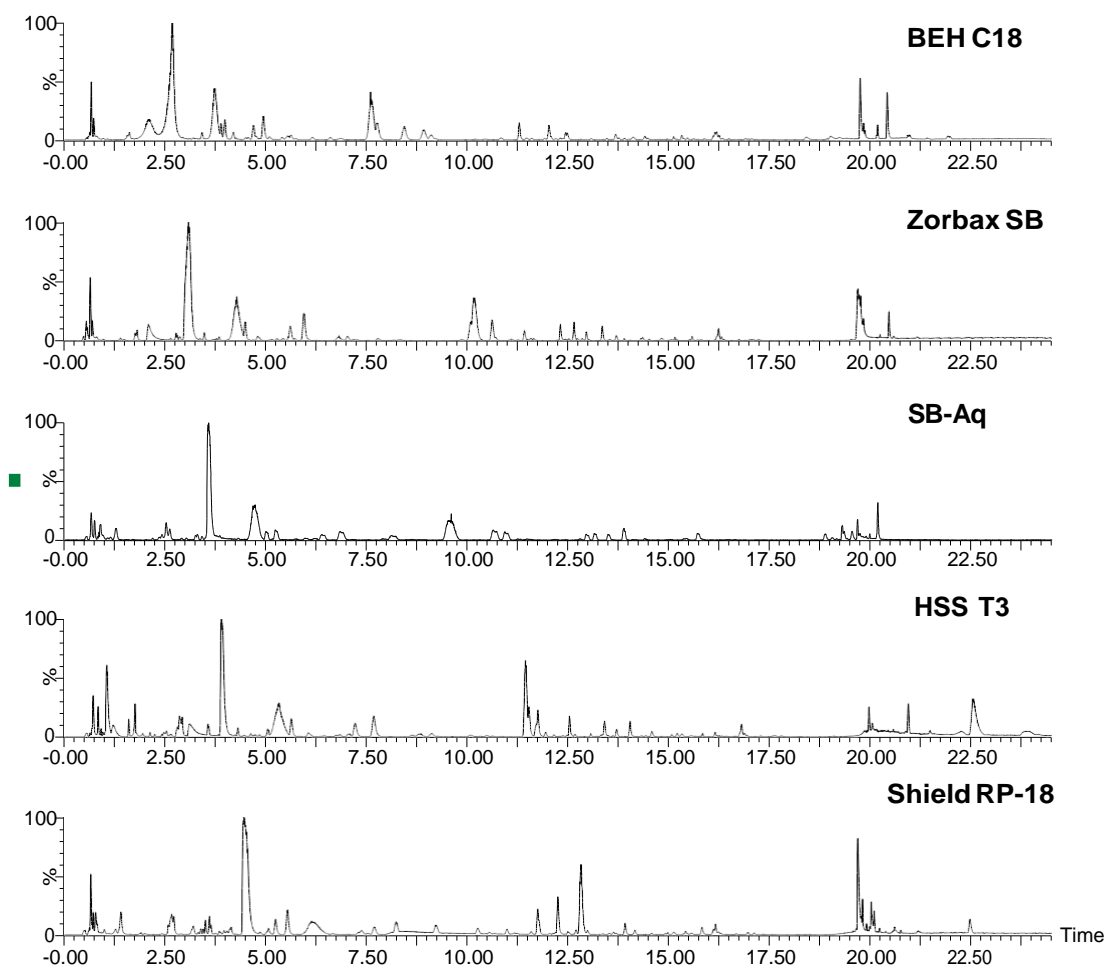

**Fig. S2** Comparison of five different RP stationary phases on the selectivity of *C. tinctorius* components. Data were acquired on a Waters UPLC/QTOF instrument.

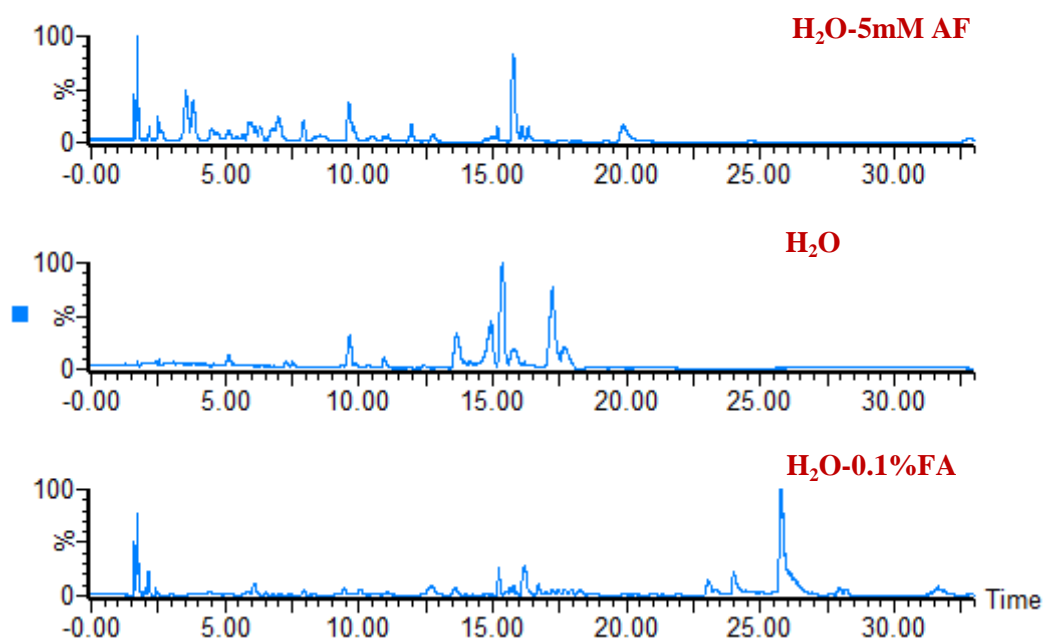

**Fig. S3** The <sup>1</sup>D HILIC separation of *C. tinctorius* components using different mobile phases. AF, ammonium formate; FA, formic acid. Data were acquired on a Waters UPLC/QTOF instrument.

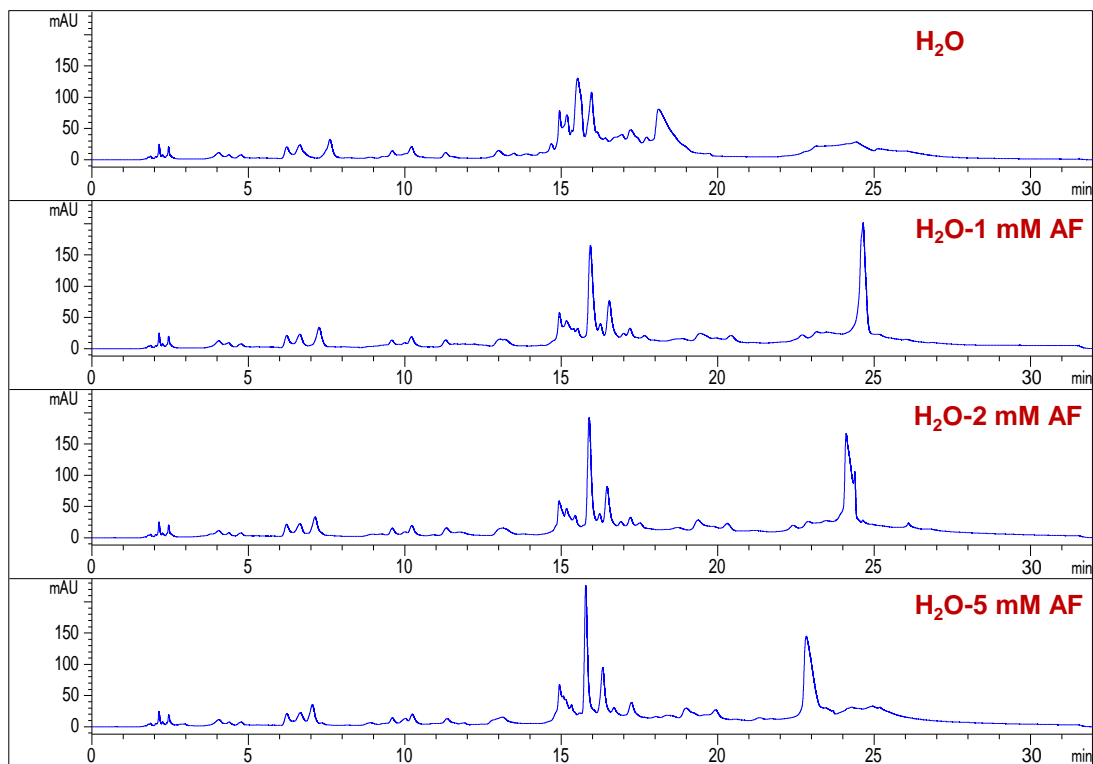

**Fig. S4** Comparison of the addition of different concentrations of ammonium formate (AF) in the mobile phase on the separation of *C. tinctorius* components.

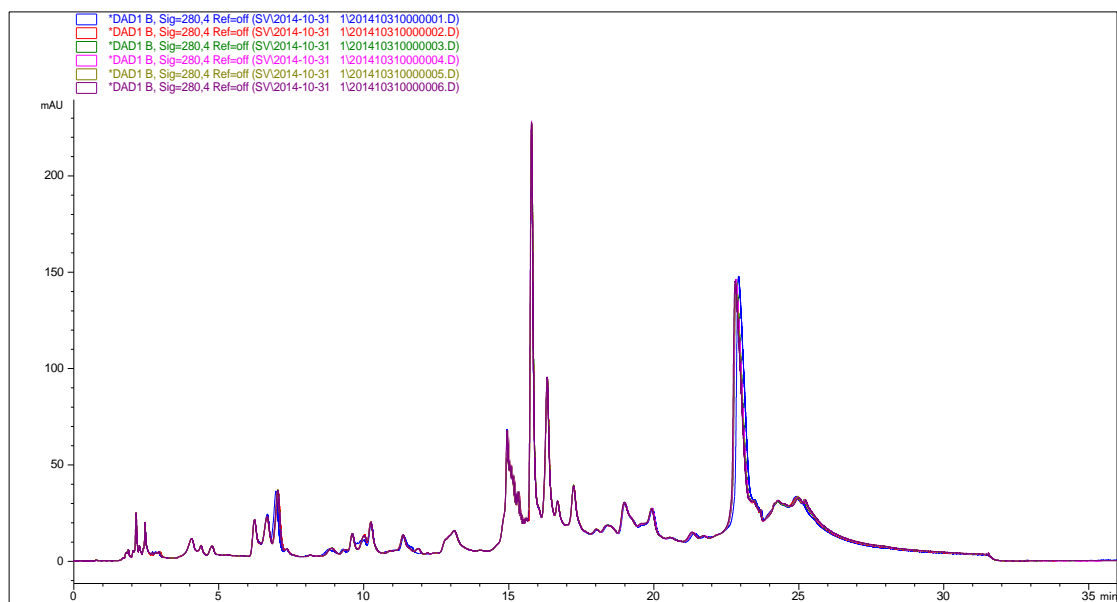

**Fig. S5** A precision test of the <sup>1</sup>D HILIC method (n=6).

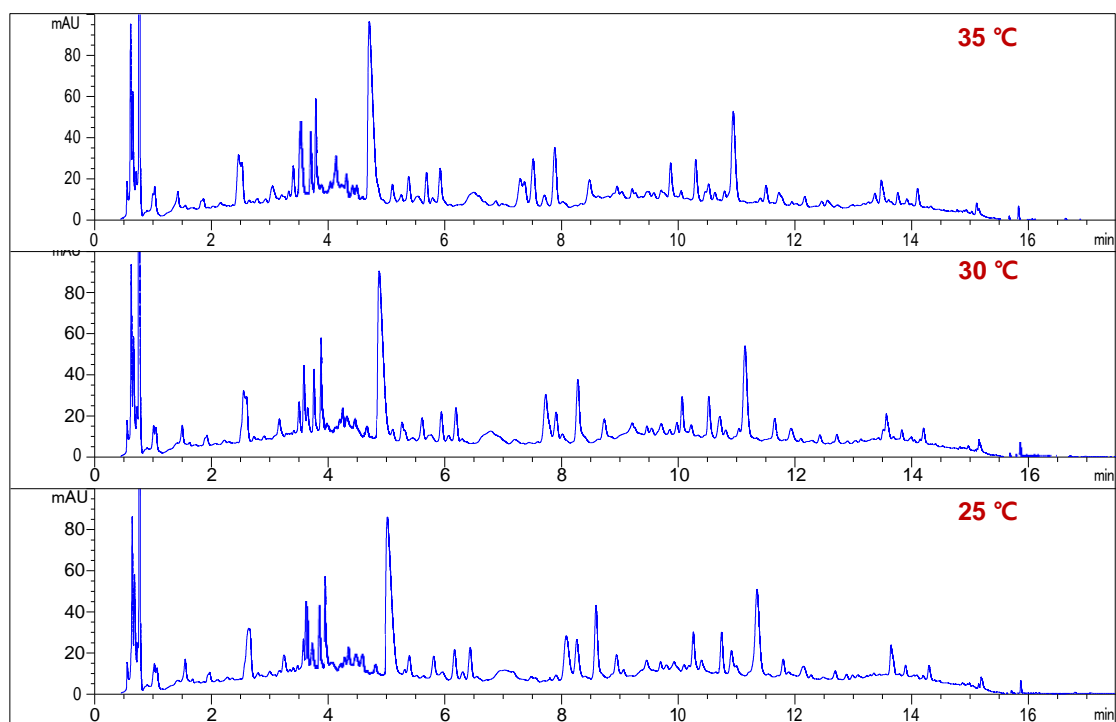

**Fig. S6** Comparison of different column temperature on the  $^2\text{D}$  separation of *C. tinctorius* components.



HSYA

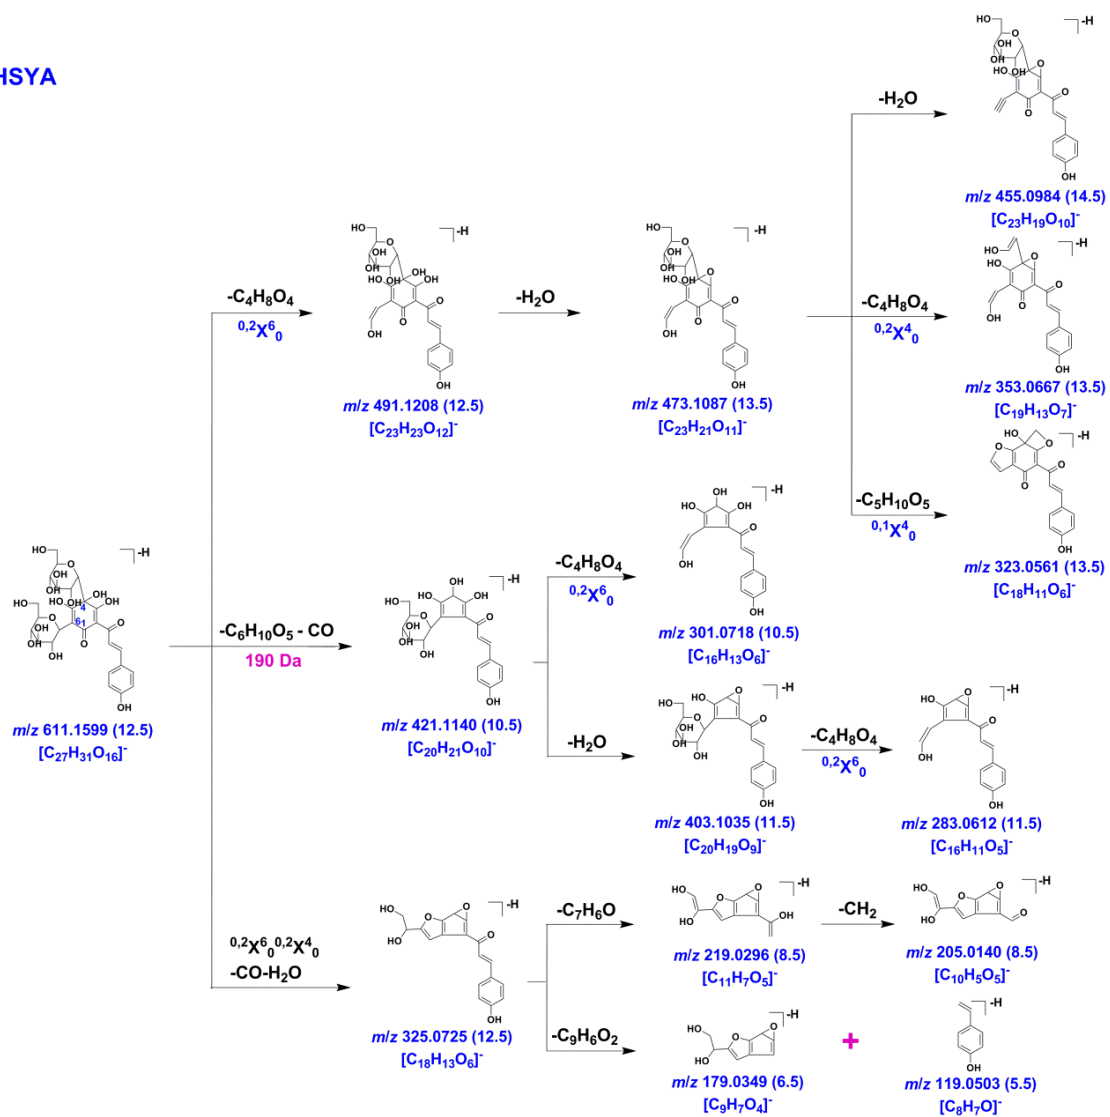

**Fig. S7** The proposed fragmentation pathways for HSYA based on the negative mode CID-MS<sup>3</sup> data obtained on an LTQ-Orbitrap hybrid mass spectrometer.

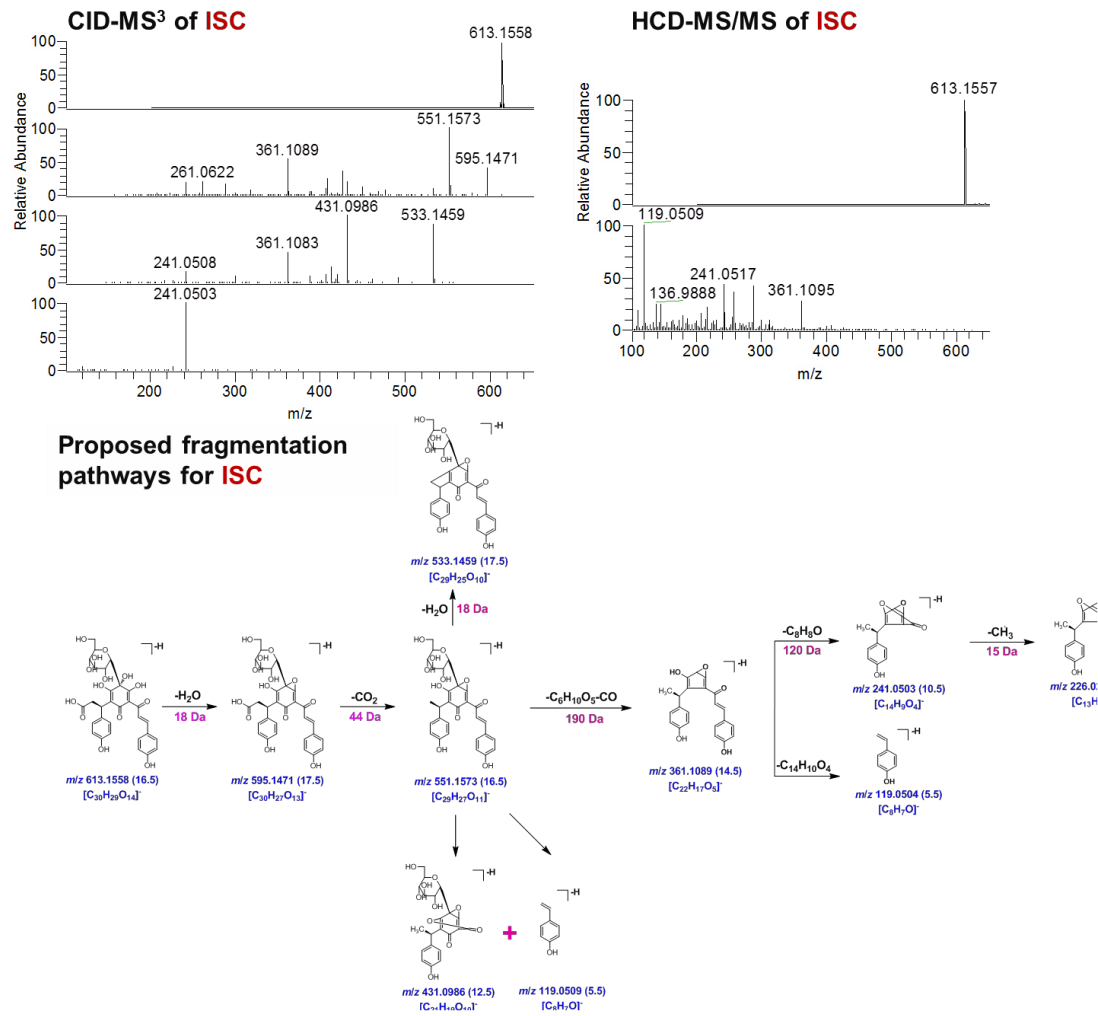

**Fig. S8** The CID-MS<sup>3</sup> and HCD-MS/MS spectra and proposed fragmentation pathways for ISC.

AnHSYB

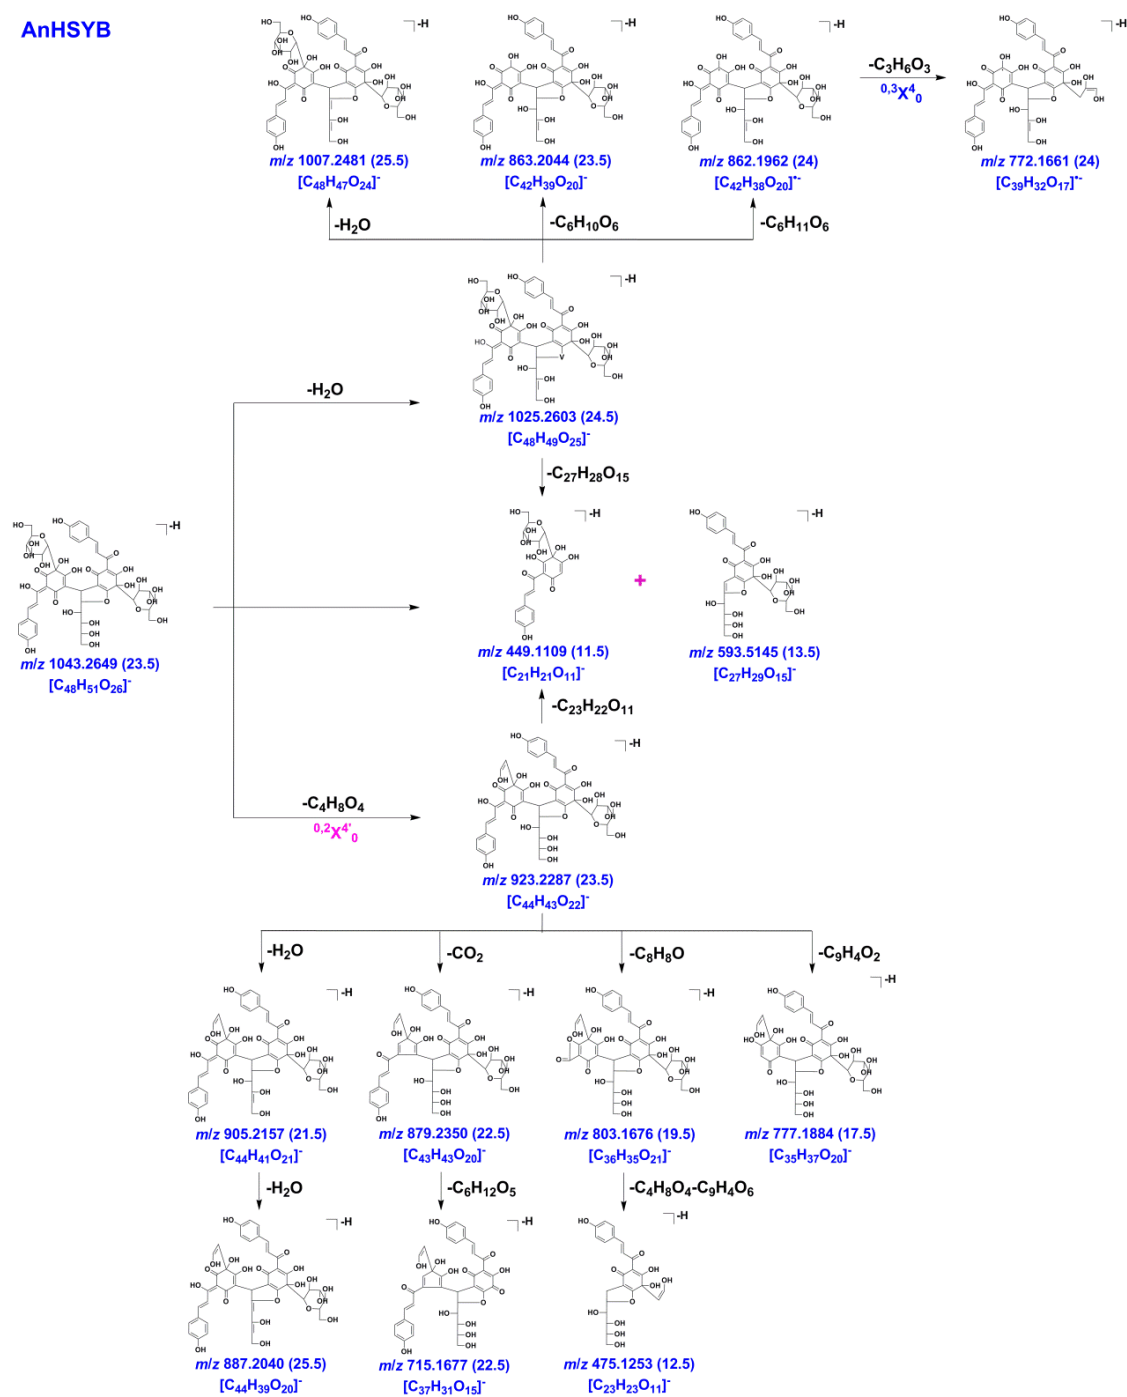

**Fig. S9** The proposed fragmentation pathways for AnHSYB based on the negative mode CID-MS<sup>3</sup> and HCD-MS/MS data obtained on an LTQ-Orbitrap hybrid mass spectrometer.

**Table S1** Detailed information with respect to the 163 quinochalcone C-glycoside compounds characterized from *C. tinctorius* by the offline comprehensive 2D LC and high-resolution LTQ-Orbitrap MS analysis.

| No.            | t <sub>R</sub> (min) | Fr. | [M-H] <sup>-</sup>                                               | Observed m/z | Mass error | RDB  | CID-MS <sup>3</sup>                                                                                                                                                       | HCD-MS <sup>2</sup><br>(abundance in %)                       | Identification                                       |
|----------------|----------------------|-----|------------------------------------------------------------------|--------------|------------|------|---------------------------------------------------------------------------------------------------------------------------------------------------------------------------|---------------------------------------------------------------|------------------------------------------------------|
| 1 <sup>c</sup> | 2.95                 | 9   | [C <sub>32</sub> H <sub>31</sub> O <sub>15</sub> ] <sup>-</sup>  | 655.1170     | 4.3        | 17.5 | MS <sup>2</sup> [655]: 637.1594, 619.1487, 611.1628<br>MS <sup>3</sup> [655→637]: 619.1473, 517.1156, 491.1196<br>MS <sup>3</sup> [655→619]: 473.1094, 601.137            | MS <sup>2</sup> [655]: 325.0714, 283.061, 119.0504            | X-Glc-C <sub>11</sub> H <sub>10</sub> O <sub>4</sub> |
| 2 <sup>c</sup> | 2.99                 | 10  | [C <sub>33</sub> H <sub>34</sub> NO <sub>18</sub> ] <sup>-</sup> | 732.1817     | 4.8        | 17.5 | MS <sup>2</sup> [732]: 611.1628, 491.1203, 403.1042<br>MS <sup>3</sup> [732→611]: 491.1197, 403.1036, 325.0718<br>MS <sup>3</sup> [732→491]: 473.1091, 283.0612, 301.0718 | MS <sup>2</sup> [732]: 119.0504, 283.0612, 325.0718           | X-2Glc-C <sub>6</sub> H <sub>3</sub> NO <sub>2</sub> |
| 3 <sup>c</sup> | 3.51                 | 10  | [C <sub>27</sub> H <sub>31</sub> O <sub>16</sub> ] <sup>-</sup>  | 611.1615     | -0.4       | 12.5 | MS <sup>2</sup> [611]: 491.1201, 473.1101<br>MS <sup>3</sup> [611→491]: 473.1087, 323.0561, 283.0612<br>MS <sup>3</sup> [611→473]: 323.0561, 455.0984, 353.0514           | MS <sup>2</sup> [611]: 328.0593, 119.0506, 208.0017           | Isomer of Hydroxysafflor yellow A                    |
| 4 <sup>c</sup> | 3.53                 | 9   | [C <sub>21</sub> H <sub>23</sub> O <sub>12</sub> ] <sup>-</sup>  | 467.1198     | 0.7        | 10.5 | MS <sup>2</sup> [467]: 449.1089, 329.0878, 261.0617<br>MS <sup>3</sup> [467→449]: 317.067, 431.0984, 285.062<br>MS <sup>3</sup> [467→329]: 311.077, 179.035, 139.0402     | MS <sup>2</sup> [467]: 153.0195, 215.0714, 207.0511, 119.0504 | X-Glc-H <sub>2</sub> O                               |
| 5 <sup>c</sup> | 3.55                 | 8   | [C <sub>27</sub> H <sub>31</sub> O <sub>16</sub> ] <sup>-</sup>  | 611.1633     | 2.5        | 12.5 | MS <sup>2</sup> [611]: 491.1205, 473.1101<br>MS <sup>3</sup> [611→491]: 473.1095, 283.0615, 323.0564<br>MS <sup>3</sup> [611→473]: 323.0558, 455.0980, 353.0511           | MS <sup>2</sup> [611]: 328.0591, 208.0016, 119.0505           | Isomer of Hydroxysafflor yellow A                    |
| 6 <sup>c</sup> | 3.68                 | 10  | [C <sub>27</sub> H <sub>31</sub> O <sub>16</sub> ] <sup>-</sup>  | 611.1632     | 2.4        | 12.5 | MS <sup>2</sup> [611]: 491.1195, 473.1092<br>MS <sup>3</sup> [611→491]: 473.1092, 283.0613, 323.0562<br>MS <sup>3</sup> [611→473]: 323.0562, 455.0984, 353.0515           | MS <sup>2</sup> [611]: 328.0591, 119.0505, 208.0015           | Isomer of Hydroxysafflor yellow A                    |
| 7 <sup>c</sup> | 3.71                 | 5   | [C <sub>26</sub> H <sub>24</sub> NO <sub>15</sub> ] <sup>-</sup> | 590.1147     | -0.67      | 15.5 | MS <sup>2</sup> [590]: 572.1049, 257.0457, 465.1041<br>MS <sup>3</sup> [590→572]: 529.0989<br>MS <sup>3</sup> [590→257]: 136.9880, 119.0501                               | MS <sup>2</sup> [590]: 273.0405, 119.0504, 245.0456           | Z-Glc-C <sub>5</sub> H <sub>2</sub> O <sub>5</sub>   |
| 8 <sup>c</sup> | 3.71                 | 10  | [C <sub>39</sub> H <sub>45</sub> O <sub>24</sub> ] <sup>-</sup>  | 897.2325     | 2.1        | 17.5 | MS <sup>2</sup> [897]: 897.2210, 777.1894, 449.1098<br>MS <sup>3</sup> [897→897]: 716.1602, 861.2101, 626.1285<br>MS <sup>3</sup> [897→777]: 759.1785, 569.1312, 733.1989 | MS <sup>2</sup> [897]: 153.0196, 435.0725, 287.0563           | Unknown (450+448)                                    |

|      |      |    |                                                                  |          |      |      |                                                                                                                                                                           |                                                               |                                                     |
|------|------|----|------------------------------------------------------------------|----------|------|------|---------------------------------------------------------------------------------------------------------------------------------------------------------------------------|---------------------------------------------------------------|-----------------------------------------------------|
| 9 °  | 3.72 | 8  | [C <sub>27</sub> H <sub>34</sub> NO <sub>16</sub> ] <sup>-</sup> | 628.1895 | 1.8  | 11.5 | MS <sup>2</sup> [628]: 611.1619, 491.1195, 403.1035<br>MS <sup>3</sup> [628→611]: 491.1192, 521.1298, 403.1031<br>MS <sup>3</sup> [628→491]: 473.1089, 283.0612, 323.0561 | MS <sup>2</sup> [628]: 325.0723, 119.0505, 283.0617           | X-2Glc-NH <sub>3</sub>                              |
| 10 ° | 3.76 | 5  | [C <sub>26</sub> H <sub>26</sub> NO <sub>16</sub> ] <sup>-</sup> | 608.1252 | -0.8 | 14.5 | MS <sup>2</sup> [608]: 356.0779, 257.0458, 564.1365, 269.0458                                                                                                             | MS <sup>2</sup> [608]: 119.0504, 269.0457, 136.9882           | Z-Glc-C <sub>5</sub> H <sub>4</sub> O <sub>6</sub>  |
| 11 ° | 3.90 | 10 | [C <sub>27</sub> H <sub>31</sub> O <sub>16</sub> ] <sup>-</sup>  | 611.1630 | 2.0  | 12.5 | MS <sup>2</sup> [611]: 491.1195, 489.1253, 473.1091<br>MS <sup>3</sup> [611→491]: 473.1085, 283.0611, 323.0559                                                            | MS <sup>2</sup> [611]: 328.0589, 119.0505, 489.1253, 208.0017 | Isomer of Hydroxysafflor yellow A                   |
| 12 ° | 3.93 | 10 | [C <sub>36</sub> H <sub>39</sub> O <sub>17</sub> ] <sup>-</sup>  | 743.2159 | -4.5 | 17.5 | MS <sup>2</sup> [743]: 491.1206, 611.1631, 628.1894<br>MS <sup>3</sup> [743→491]: 473.1092, 283.0613, 323.0562<br>MS <sup>3</sup> [743→611]: 491.1193                     | MS <sup>2</sup> [743]: 119.0504, 328.0584, 283.0610           | X-2Glc-C <sub>9</sub> H <sub>8</sub> O              |
| 13 ° | 4.03 | 10 | [C <sub>27</sub> H <sub>31</sub> O <sub>17</sub> ] <sup>-</sup>  | 627.1580 | 2.1  | 12.5 | MS <sup>2</sup> [627]: 419.0991, 583.1678, 609.1469<br>MS <sup>3</sup> [627→419]: 299.0557, 329.0662, 401.0872<br>MS <sup>3</sup> [627→583]: 493.1355, 565.1565, 475.1248 | MS <sup>2</sup> [627]: 119.0504, 178.9987, 299.0562           | Isomer of Methylsafflorin C or Methylisosafflorin C |
| 14 ° | 4.14 | 10 | [C <sub>27</sub> H <sub>31</sub> O <sub>16</sub> ] <sup>-</sup>  | 611.1623 | 0.9  | 12.5 | MS <sup>2</sup> [611]: 521.1300, 491.1194, 371.0772<br>MS <sup>3</sup> [611→521]: 503.11, 313.0718, 401.0876<br>MS <sup>3</sup> [611→491]: 371.0773, 327.0875, 473.109    | MS <sup>2</sup> [611]: 119.0505, 300.0640, 358.0695           | Isomer of Hydroxysafflor yellow B/C or Safflorin A  |
| 15 ° | 4.24 | 10 | [C <sub>33</sub> H <sub>41</sub> O <sub>21</sub> ] <sup>-</sup>  | 773.2141 | -0.6 | 13.5 | MS <sup>2</sup> [773]: 653.1743, 487.1263, 565.1583<br>MS <sup>3</sup> [773→653]: 635.1624, 445.1147, 463.1253<br>MS <sup>3</sup> [773→487]: 325.0714, 459.1292, 443.1343 | MS <sup>2</sup> [773]: 487.1248, 445.1144, 119.0506           | X-3Glc                                              |
| 16 ° | 4.29 | 5  | [C <sub>26</sub> H <sub>27</sub> O <sub>16</sub> ] <sup>-</sup>  | 595.1310 | 1.0  | 13.5 | MS <sup>2</sup> [595]: 449.1095, 287.0564, 407.0988<br>MS <sup>3</sup> [595→449]: 431.0977, 299.0557, 287.0557                                                            | MS <sup>2</sup> [595]: 287.0562, 119.0504, 257.0458           | X-Glc-C <sub>5</sub> H <sub>6</sub> O <sub>5</sub>  |
| 17 ° | 4.41 | 5  | [C <sub>26</sub> H <sub>27</sub> O <sub>16</sub> ] <sup>-</sup>  | 595.1307 | 0.5  | 13.5 | MS <sup>2</sup> [595]: 449.1093, 287.0563, 407.0987<br>MS <sup>3</sup> [595→449]: 431.0975, 299.0558, 287.0558                                                            | MS <sup>2</sup> [595]: 119.0504, 287.0561, 257.0455           | X-Glc-C <sub>5</sub> H <sub>6</sub> O <sub>5</sub>  |
| 18 ° | 4.44 | 7  | [C <sub>20</sub> H <sub>19</sub> O <sub>11</sub> ] <sup>-</sup>  | 435.0945 | 2.8  | 11.5 | MS <sup>2</sup> [435]: 417.0832, 315.0511, 245.0459<br>MS <sup>3</sup> [435→417]: 273.0404, 245.0455, 297.0252<br>MS <sup>3</sup> [435→315]: 245.0453, 287.0558           | MS <sup>2</sup> [435]: 119.0505, 245.0457, 273.0406           | Unknown                                             |
| 19 ° | 4.48 | 10 | [C <sub>27</sub> H <sub>31</sub> O <sub>16</sub> ] <sup>-</sup>  | 611.1623 | 0.9  | 12.5 | MS <sup>2</sup> [611]: 521.1309, 593.1522, 445.1148<br>MS <sup>3</sup> [611→521]: 503.1200, 313.0722, 358.0698<br>MS <sup>3</sup> [611→593]: 503.1200, 473.1095, 575.1407 | -                                                             | Isomer of Hydroxysafflor yellow B/C or Safflorin A  |
| 20 ° | 4.49 | 8  | [C <sub>27</sub> H <sub>31</sub> O <sub>16</sub> ] <sup>-</sup>  | 611.1636 | 3.0  | 12.5 | MS <sup>2</sup> [611]: 491.1193, 551.1405, 403.1032                                                                                                                       | MS <sup>2</sup> [611]: 325.0714, 283.061, 491.1190            | Isomer of Hydroxysafflor yellow A                   |

|                 |      |    |                                                                 |           |     |      |                                                                                                                                                                                         |                                                                |                                                                               |
|-----------------|------|----|-----------------------------------------------------------------|-----------|-----|------|-----------------------------------------------------------------------------------------------------------------------------------------------------------------------------------------|----------------------------------------------------------------|-------------------------------------------------------------------------------|
|                 |      |    |                                                                 |           |     |      | MS <sup>3</sup> [611→491]: 473.1086, 283.0611, 301.0717<br>MS <sup>3</sup> [611→473]: 491.1192                                                                                          |                                                                |                                                                               |
| 21 <sup>c</sup> | 4.60 | 10 | [C <sub>39</sub> H <sub>45</sub> O <sub>24</sub> ] <sup>-</sup> | 897.2316  | 1.1 | 17.5 | MS <sup>2</sup> [897]: 879.2219, 777.1900, 449.1102, 429.1051<br>MS <sup>3</sup> [897→897]: 716.1596, 861.2094, 449.1091<br>MS <sup>3</sup> [897→777]: 759.1787, 569.1312, 733.1993     | MS <sup>2</sup> [897]: 119.0506, 153.0196, 287.0565            | Unknown (450+448)                                                             |
| 22              | 4.62 | 9  | [C <sub>27</sub> H <sub>31</sub> O <sub>17</sub> ] <sup>-</sup> | 627.1570  | 0.6 | 12.5 | MS <sup>2</sup> [627]: 419.0987, 609.1467, 299.0563<br>MS <sup>3</sup> [627→419]: 299.0561<br>MS <sup>3</sup> [627→609]: 401.0880, 419.0987, 281.0457                                   | MS <sup>2</sup> [627]: 153.0196, 119.0505, 125.0247            | Methylsafflomin C/<br>Methylisosafflomin C                                    |
| 23 <sup>c</sup> | 4.80 | 8  | [C <sub>27</sub> H <sub>31</sub> O <sub>17</sub> ] <sup>-</sup> | 627.1573  | 1.1 | 12.5 | MS <sup>2</sup> [627]: 463.1102, 481.1207, 419.0991<br>MS <sup>3</sup> [627→463]: 343.0667, 445.0983, 403.0878<br>MS <sup>3</sup> [627→481]: 361.0779, 463.1097, 343.0673               | MS <sup>2</sup> [627]: 153.0195, 119.0505, 299.0560            | Isomer of Methylsafflomin C<br>or Methylisosafflomin C                        |
| 24 <sup>c</sup> | 4.90 | 12 | [C <sub>48</sub> H <sub>51</sub> O <sub>26</sub> ] <sup>-</sup> | 1043.2683 | 0.9 | 23.5 | MS <sup>2</sup> [1043]: 593.1525, 449.1100, 473.1100, 1025.2584<br>MS <sup>3</sup> [1043→593]: 515.1201, 473.1095, 365.0670<br>MS <sup>3</sup> [1043→449]: 431.0985, 299.0563, 287.0563 | MS <sup>2</sup> [1043]: 286.0485, 119.0505, 299.0563, 449.1093 | Isomer of Anhydrosafflor<br>Yellow B                                          |
| 25 <sup>d</sup> | 4.94 | 12 | [C <sub>50</sub> H <sub>51</sub> O <sub>30</sub> ] <sup>-</sup> | 1131.2487 | 1.4 | 25.5 | MS <sup>2</sup> [1131]: 1113.2374, 505.0998, 637.1421<br>MS <sup>3</sup> [1131→1131]: 1095.2268, 625.1416, 949.1896<br>MS <sup>3</sup> [1131→505]: 297.0408, 461.1094, 271.0615         | MS <sup>2</sup> [1131]: 119.0504, 299.0197, 271.0248, 463.0883 | (C <sub>17</sub> H <sub>12</sub> O <sub>8</sub> -Glc)+(quercetin-<br>Glc-Glc) |
| 26 <sup>c</sup> | 4.95 | 9  | [C <sub>33</sub> H <sub>41</sub> O <sub>21</sub> ] <sup>-</sup> | 773.2185  | 1.6 | 13.5 | MS <sup>2</sup> [773]: 491.1199, 565.1567, 473.1094<br>MS <sup>3</sup> [773→491]: 473.1058, 283.061, 301.0715<br>MS <sup>3</sup> [773→565]: 325.0717, 445.0988, 547.146                 | MS <sup>2</sup> [773]: 119.0504, 325.0717, 283.0612            | X-3Glc                                                                        |
| 27              | 4.98 | 8  | [C <sub>27</sub> H <sub>31</sub> O <sub>17</sub> ] <sup>-</sup> | 627.1573  | 1.1 | 12.5 | MS <sup>2</sup> [627]: 437.1094, 419.0989, 609.1468<br>MS <sup>3</sup> [627→437]: 299.0564, 419.0989, 269.0458<br>MS <sup>3</sup> [627→419]: 2999.0564                                  | MS <sup>2</sup> [627]: 207.0513, 419.0988, 119.0506            | Methylsafflomin C/<br>Methylisosafflomin C                                    |
| 28 <sup>c</sup> | 5.04 | 7  | [C <sub>27</sub> H <sub>31</sub> O <sub>16</sub> ] <sup>-</sup> | 611.1627  | 1.6 | 12.5 | MS <sup>2</sup> [611]: 491.1201, 521.1307, 593.152<br>MS <sup>3</sup> [611→491]: 329.0670, 473.1093, 283.0616<br>MS <sup>3</sup> [611→521]: 359.0774, 503.1199, 313.0718                | MS <sup>2</sup> [611]: 328.0588, 119.0504, 299.0562            | Isomer of Hydroxysafflor<br>yellow A                                          |
| 29 <sup>c</sup> | 5.08 | 7  | [C <sub>26</sub> H <sub>27</sub> O <sub>15</sub> ] <sup>-</sup> | 579.1361  | 1.0 | 13.5 | MS <sup>2</sup> [579]: 371.0776, 561.1257, 287.0564<br>MS <sup>3</sup> [579→371]: 311.056, 251.0197, 353.0666<br>MS <sup>3</sup> [579→561]: 501.1044, 373.0932, 543.1151                | MS <sup>2</sup> [579]: 119.0505, 187.0403, 257.046             | X-Glc-C <sub>5</sub> H <sub>6</sub> O <sub>4</sub>                            |
| 30 <sup>c</sup> | 5.14 | 6  | [C <sub>20</sub> H <sub>21</sub> O <sub>11</sub> ] <sup>-</sup> | 437.1095  | 1.3 | 10.5 | MS <sup>2</sup> [437]: 299.0563, 419.0988, 291.0725<br>MS <sup>3</sup> [437→299]: 178.9985                                                                                              | MS <sup>2</sup> [437]: 119.0504, 178.9987, 299.0561            | Unknown                                                                       |

|       |      |    |                                                                 |          |     |      |                                                                                                                                                                                             |                                                     |                                                         |
|-------|------|----|-----------------------------------------------------------------|----------|-----|------|---------------------------------------------------------------------------------------------------------------------------------------------------------------------------------------------|-----------------------------------------------------|---------------------------------------------------------|
| 31 °C | 5.15 | 7  | [C <sub>28</sub> H <sub>31</sub> O <sub>17</sub> ] <sup>-</sup> | 639.1569 | 0.3 | 13.5 | MS <sup>2</sup> [437→419]: 299.056<br>MS <sup>2</sup> [639]: 549.1259, 419.0990, 519.1152<br>MS <sup>3</sup> [639→549]: 419.0979, 519.1140, 531.1140<br>MS <sup>3</sup> [639→419]: 299.0558 | MS <sup>2</sup> [639]: 119.0504, 299.0561, 145.0296 | Y-2Glc-O                                                |
| 32 °C | 5.17 | 9  | [C <sub>33</sub> H <sub>41</sub> O <sub>21</sub> ] <sup>-</sup> | 773.2153 | 0.9 | 13.5 | MS <sup>2</sup> [773]: 491.1204, 565.1573, 683.1839<br>MS <sup>3</sup> [773→491]: 473.1089, 283.0612, 301.0717<br>MS <sup>3</sup> [773→565]: 325.0715, 445.0982, 547.1457                   | MS <sup>2</sup> [773]: 119.0504, 325.0718, 205.0143 | X-3Glc                                                  |
| 33    | 5.18 | 8  | [C <sub>27</sub> H <sub>31</sub> O <sub>17</sub> ] <sup>-</sup> | 627.1583 | 2.5 | 12.5 | MS <sup>2</sup> [627]: 609.147, 437.1096, 419.099<br>MS <sup>3</sup> [627→609]: 401.0882, 281.0458, 419.0988<br>MS <sup>3</sup> [627→437]: 299.0559, 419.098, 26.0454                       | MS <sup>2</sup> [627]: 187.0401, 207.051, 119.0504  | Methylsafflomin C/<br>Methylisosafflomin C              |
| 34 °C | 5.19 | 10 | [C <sub>41</sub> H <sub>45</sub> O <sub>26</sub> ] <sup>-</sup> | 953.2215 | 1.1 | 19.5 | MS <sup>2</sup> [953]: 935.2113, 833.1799, 503.1054<br>MS <sup>3</sup> [953→935]: 773.158, 917.2003, 744.1552<br>MS <sup>3</sup> [953→833]: 815.1684, 735.179, 625.1207                     | MS <sup>2</sup> [953]: 287.0561, 119.0504, 197.0092 | (X-Glc)+C <sub>20</sub> H <sub>23</sub> O <sub>15</sub> |
| 35 °C | 5.20 | 9  | [C <sub>33</sub> H <sub>39</sub> O <sub>22</sub> ] <sup>-</sup> | 787.1942 | 0.5 | 14.5 | MS <sup>2</sup> [787]: 743.2044, 725.1946<br>MS <sup>3</sup> [787→743]: 653.1731, 725.1945, 623.1628<br>MS <sup>3</sup> [787→725]: 587.1406, 605.1512, 707.1826                             | MS <sup>2</sup> [787]: 287.0560, 119.0505, 257.0455 | X-2Glc-C <sub>6</sub> H <sub>8</sub> O <sub>6</sub>     |
| 36 °C | 5.25 | 8  | [C <sub>33</sub> H <sub>39</sub> O <sub>22</sub> ] <sup>-</sup> | 787.1955 | 2.1 | 14.5 | MS <sup>2</sup> [787]: 743.2059, 725.1962<br>MS <sup>3</sup> [787→743]: 653.1733, 725.1946, 623.163<br>MS <sup>3</sup> [787→725]: 587.1415, 707.1838, 605.1522                              | MS <sup>2</sup> [787]: 287.0563, 119.0505, 257.0458 | X-2Glc-C <sub>6</sub> H <sub>8</sub> O <sub>6</sub>     |
| 37    | 5.25 | 7  | [C <sub>27</sub> H <sub>31</sub> O <sub>15</sub> ] <sup>-</sup> | 595.1685 | 2.3 | 12.5 | MS <sup>2</sup> [595]: 355.0832, 385.0937, 4753.1258<br>MS <sup>3</sup> [595→355]: 313.0713, 325.0713, 265.0351<br>MS <sup>3</sup> [595→385]: 235.0249, 209.0456, 249.0405                  | MS <sup>2</sup> [595]: 355.0824, 385.0929, 313.0719 | Saffloquinoside C or isomer                             |
| 38 °C | 5.37 | 9  | [C <sub>27</sub> H <sub>31</sub> O <sub>17</sub> ] <sup>-</sup> | 627.1567 | 1.7 | 12.5 | MS <sup>2</sup> [627]: 419.0987, 437.1092, 299.0564<br>MS <sup>3</sup> [627→419]: 299.0563, 329.0668, 178.9987<br>MS <sup>3</sup> [627→437]: 299.0564, 419.0987, 269.0457                   | MS <sup>2</sup> [627]: 207.0512, 119.0505, 257.0457 | Isomer of Methylsafflomin C<br>or Methylisosafflomin C  |
| 39 °C | 5.54 | 9  | [C <sub>27</sub> H <sub>31</sub> O <sub>17</sub> ] <sup>-</sup> | 627.1567 | 1.4 | 12.5 | MS <sup>2</sup> [627]: 609.1461, 437.1088, 401.0878<br>MS <sup>3</sup> [627→609]: 401.0875, 311.056, 383.0770<br>MS <sup>3</sup> [627→437]: 299.0558, 419.0978                              | MS <sup>2</sup> [627]: 207.0510, 119.0504, 257.0456 | Isomer of Methylsafflomin C<br>or Methylisosafflomin C  |
| 40 °C | 5.62 | 7  | [C <sub>20</sub> H <sub>21</sub> O <sub>11</sub> ] <sup>-</sup> | 437.1091 | 0.4 | 10.5 | MS <sup>2</sup> [437]: 299.0562, 291.0724, 419.0988                                                                                                                                         | MS <sup>2</sup> [437]: 119.0504, 153.0195, 178.9987 | Y-Glc-2C                                                |

|       |      |    |                                                                 |           |      |      |                                                                                                                                                                                         |                                                                         |                                                     |
|-------|------|----|-----------------------------------------------------------------|-----------|------|------|-----------------------------------------------------------------------------------------------------------------------------------------------------------------------------------------|-------------------------------------------------------------------------|-----------------------------------------------------|
|       |      |    |                                                                 |           |      |      | MS <sup>3</sup> [437→299]: 178.9986<br>MS <sup>3</sup> [437→291]: 273.0611, 153.0193, 141.0196                                                                                          |                                                                         |                                                     |
| 41 °C | 5.69 | 7  | [C <sub>27</sub> H <sub>29</sub> O <sub>16</sub> ] <sup>-</sup> | 609.1463  | 0.3  | 13.5 | MS <sup>2</sup> [609]: 419.0991, 519.1154, 591.1364<br>MS <sup>3</sup> [609→419]: 299.0558<br>MS <sup>3</sup> [609→519]: 419.098, 299.056                                               | MS <sup>2</sup> [609]: 119.0505, 299.056, 178.9988                      | Y-2Glc—CH <sub>2</sub>                              |
| 42 °C | 5.71 | 8  | [C <sub>32</sub> H <sub>39</sub> O <sub>20</sub> ] <sup>-</sup> | 743.2040  | 0.0  | 13.5 | MS <sup>2</sup> [743]: 491.1199, 535.1462, 325.0721<br>MS <sup>3</sup> [743→491]: 473.1089, 283.0612, 301.0717<br>MS <sup>3</sup> [743→535]: 325.0717, 517.1354, 415.0882               | MS <sup>2</sup> [743]: 119.0505, 325.072, 205.0144                      | X-2Glc-C <sub>5</sub> H <sub>8</sub> O <sub>4</sub> |
| 43 °C | 5.72 | 7  | [C <sub>27</sub> H <sub>31</sub> O <sub>16</sub> ] <sup>-</sup> | 611.1632  | 2.4  | 12.5 | MS <sup>2</sup> [611]: 521.1306, 445.1145, 593.1519<br>MS <sup>3</sup> [611→491]: 503.1199, 313.0719, 358.0695<br>MS <sup>3</sup> [611→473]: 325.0563, 299.0771, 427.1032               | MS <sup>2</sup> [611]: 119.0504, 287.0562, 207.0511                     | Isomer of Hydroxysafflor yellow B/C or Safflomin A  |
| 44 °C | 5.76 | 12 | [C <sub>48</sub> H <sub>51</sub> O <sub>26</sub> ] <sup>-</sup> | 1043.2681 | 0.6  | 23.5 | MS <sup>2</sup> [1043]: 593.1524, 449.1099, 473.1099, 1025.2574<br>MS <sup>3</sup> [1043→593]: 515.1200, 473.1093, 365.0669<br>MS <sup>3</sup> [1043→449]: 431.0985, 287.0564, 299.0565 | MS <sup>2</sup> [1043]: 286.0487, 119.0505, 299.0565                    | Isomer of Anhydrosafflor Yellow B                   |
| 45 °C | 5.79 | 7  | [C <sub>27</sub> H <sub>31</sub> O <sub>17</sub> ] <sup>-</sup> | 627.1572  | 0.8  | 12.5 | MS <sup>2</sup> [627]: 419.0993, 609.1474, 583.1683<br>MS <sup>3</sup> [627→419]: 299.0562, 329.0668<br>MS <sup>3</sup> [627→609]: 447.0937, 519.1148, 419.0985                         | MS <sup>2</sup> [627]: 299.0561, 119.0505, 178.9988                     | Isomer of Methylsafflomin C or Methylisosafflomin C |
| 46 °C | 5.86 | 9  | [C <sub>33</sub> H <sub>41</sub> O <sub>21</sub> ] <sup>-</sup> | 773.2153  | 0.9  | 13.5 | MS <sup>2</sup> [773]: 653.1733, 403.1042, 635.163<br>MS <sup>3</sup> [773→653]: 635.1625, 465.1256, 323.0565<br>MS <sup>3</sup> [773→403]: 325.0716, 385.0928, 283.061                 | MS <sup>2</sup> [773]: 119.0504, 325.0714, 283.061, 205.0142            | X-3Glc                                              |
| 47 °C | 5.89 | 7  | [C <sub>27</sub> H <sub>31</sub> O <sub>16</sub> ] <sup>-</sup> | 611.1619  | 0.2  | 12.5 | MS <sup>2</sup> [611]: 521.13, 445.114, 593.1511<br>MS <sup>3</sup> [611→521]: 503.1193, 313.0716<br>MS <sup>3</sup> [611→445]: 325.0564, 299.0771, 427.1036                            | MS <sup>2</sup> [611]: 119.0505, 287.0562, 207.0512                     | Isomer of Hydroxysafflor yellow B/C or Safflomin A  |
| 48 °C | 5.96 | 8  | [C <sub>27</sub> H <sub>31</sub> O <sub>16</sub> ] <sup>-</sup> | 611.1602  | -2.5 | 12.5 | MS <sup>2</sup> [611]: 491.1209, 325.0725, 403.1046<br>MS <sup>3</sup> [611→491]: 473.1088, 283.0612, 301.0717<br>MS <sup>3</sup> [611→325]: 205.0142, 219.0298, 179.035                | MS <sup>2</sup> [611]: 119.0507, 325.0726, 205.0149                     | Isomer of Hydroxysafflor yellow A                   |
| 49 °C | 5.97 | 5  | [C <sub>27</sub> H <sub>29</sub> O <sub>14</sub> ] <sup>-</sup> | 577.1569  | 1.1  | 13.5 | MS <sup>2</sup> [577]: 457.1145<br>MS <sup>3</sup> [577→457]: 337.0719                                                                                                                  | MS <sup>2</sup> [577]: 217.0143, 337.0717, 119.0504                     | X-2Glc—2OH                                          |
| 50 °C | 5.99 | 8  | [C <sub>27</sub> H <sub>31</sub> O <sub>16</sub> ] <sup>-</sup> | 611.1596  | -3.5 | 12.5 | MS <sup>2</sup> [611]: 491.1211, 325.0726, 403.1047, 473.1107                                                                                                                           | MS <sup>2</sup> [611]: 325.0721, 119.0507, 205.0147, 283.0616, 163.0041 | Isomer of Hydroxysafflor yellow A                   |



|                 |      |    |                                                                 |          |      |      |                                                                                                                                                                                               |                                                                         |                                                    |
|-----------------|------|----|-----------------------------------------------------------------|----------|------|------|-----------------------------------------------------------------------------------------------------------------------------------------------------------------------------------------------|-------------------------------------------------------------------------|----------------------------------------------------|
|                 |      |    |                                                                 |          |      |      | MS <sup>3</sup> [611→491]: 473.1092, 283.0614, 301.0719, 323.0563<br>MS <sup>3</sup> [611→325]: 205.0143, 219.0300, 179.050                                                                   |                                                                         |                                                    |
| 51 <sup>c</sup> | 6.02 | 10 | [C <sub>39</sub> H <sub>35</sub> O <sub>15</sub> ] <sup>-</sup> | 743.1951 | 4.1  | 22.5 | MS <sup>2</sup> [743]: 419.0991, 437.1096, 299.0566<br>MS <sup>3</sup> [743→419]: 299.0563, 329.0668<br>MS <sup>3</sup> [743→437]: 299.0564, 419.0986, 269.0460                               | MS <sup>2</sup> [743]: 178.9986, 299.056, 119.0504                      | Unknown                                            |
| 52 <sup>b</sup> | 6.05 | 8  | [C <sub>27</sub> H <sub>31</sub> O <sub>16</sub> ] <sup>-</sup> | 611.1599 | -3.0 | 12.5 | MS <sup>2</sup> [611]: 491.1208, 325.0725, 403.1045, 473.1104<br>MS <sup>3</sup> [611→491]: 473.1087, 283.0612, 301.0717, 323.0560<br>MS <sup>3</sup> [611→325]: 205.0140, 219.0296, 179.0349 | MS <sup>2</sup> [611]: 325.0721, 119.0507, 205.0147, 283.0616, 163.0041 | Hydroxysafflor yellow A                            |
| 53 <sup>c</sup> | 6.06 | 10 | [C <sub>21</sub> H <sub>21</sub> O <sub>13</sub> ] <sup>-</sup> | 481.0990 | 0.5  | 11.5 | MS <sup>2</sup> [481]: 419.0981, 463.0879, 299.056<br>MS <sup>3</sup> [481→419]: 299.0561<br>MS <sup>3</sup> [481→463]: 419.0982, 245.0457, 445.0775                                          | MS <sup>2</sup> [481]: 119.0504, 178.9987, 299.0561                     | Y-C <sub>5</sub> H <sub>10</sub> O <sub>7</sub>    |
| 54 <sup>c</sup> | 6.07 | 9  | [C <sub>33</sub> H <sub>41</sub> O <sub>21</sub> ] <sup>-</sup> | 773.2145 | -0.1 | 13.5 | MS <sup>2</sup> [773]: 491.1204, 653.1735, 565.1573<br>MS <sup>3</sup> [773→491]: 473.12091                                                                                                   | MS <sup>2</sup> [773]: 325.0717, 119.0504, 205.0143, 283.0612           | X-3Glc                                             |
| 55 <sup>c</sup> | 6.09 | 8  | [C <sub>27</sub> H <sub>31</sub> O <sub>16</sub> ] <sup>-</sup> | 611.1602 | -2.5 | 12.5 | MS <sup>2</sup> [611]: 491.1210, 325.0726, 403.1047<br>MS <sup>3</sup> [611→491]: 473.1092, 283.0614, 301.0719, 323.0563<br>MS <sup>3</sup> [611→325]: 205.0141, 219.0297, 179.0349           | MS <sup>2</sup> [611]: 119.0507, 325.0724, 205.0148, 283.0619, 163.0042 | Isomer of Hydroxysafflor yellow A                  |
| 56 <sup>c</sup> | 6.20 | 6  | [C <sub>19</sub> H <sub>19</sub> O <sub>10</sub> ] <sup>-</sup> | 407.0984 | 0.1  | 10.5 | MS <sup>2</sup> [407]: 287.056, 261.0616, 185.0092<br>MS <sup>3</sup> [407→287]: 257.0452, 227.0195, 185.0091<br>MS <sup>3</sup> [407→264]: 141.0194, 197.0296, 111.0089                      | MS <sup>2</sup> [407]: 119.0504                                         | X-C <sub>4</sub> H <sub>8</sub> O <sub>4</sub>     |
| 57 <sup>c</sup> | 6.21 | 8  | [C <sub>27</sub> H <sub>31</sub> O <sub>16</sub> ] <sup>-</sup> | 611.1615 | -0.4 | 12.5 | MS <sup>2</sup> [611]: 491.1208, 403.1045, 325.0725, 473.1103<br>MS <sup>3</sup> [611→491]: 473.1086, 283.0611, 301.0716, 323.0559<br>MS <sup>3</sup> [611→403]: 325.0715, 385.0926, 283.0610 | MS <sup>2</sup> [611]: 119.0505, 325.0721, 205.0145, 283.0615, 163.0040 | Isomer of Hydroxysafflor yellow A                  |
| 58 <sup>c</sup> | 6.41 | 10 | [C <sub>23</sub> H <sub>23</sub> O <sub>14</sub> ] <sup>-</sup> | 523.1102 | 1.7  | 12.5 | MS <sup>2</sup> [523]: 271.0614, 479.12, 315.0512<br>MS <sup>3</sup> [523→271]: 151.0036, 119.0503, 165.0193                                                                                  | MS <sup>2</sup> [523]: 119.0504, 151.0038, 276.0712                     | Y-Glc-CO <sub>2</sub> -H <sub>2</sub> O            |
| 59 <sup>c</sup> | 6.42 | 8  | [C <sub>28</sub> H <sub>29</sub> O <sub>18</sub> ] <sup>-</sup> | 653.1371 | 1.7  | 14.5 | -                                                                                                                                                                                             | MS <sup>2</sup> [653]: 287.051, 119.0504, 257.0456                      | X-Glc-C <sub>7</sub> H <sub>8</sub> O <sub>7</sub> |
| 60 <sup>c</sup> | 6.45 | 4  | [C <sub>26</sub> H <sub>29</sub> O <sub>15</sub> ] <sup>-</sup> | 581.1516 | 0.6  | 12.5 | MS <sup>2</sup> [581]: 553.1562, 421.1138, 443.0982, 243.0663, 535.1667                                                                                                                       | MS <sup>2</sup> [581]: 119.0504, 145.0296, 211.0611                     | X-2Glc-CH <sub>2</sub> O                           |
| 61 <sup>c</sup> | 6.53 | 6  | [C <sub>19</sub> H <sub>19</sub> O <sub>10</sub> ] <sup>-</sup> | 407.0989 | 1.4  | 10.5 | MS <sup>2</sup> [407]: 287.0559, 261.0615, 257.0455<br>MS <sup>3</sup> [407→287]: 257.0453, 243.0660                                                                                          | MS <sup>2</sup> [407]: 119.0504, 136.9882, 187.0401                     | X-C <sub>4</sub> H <sub>8</sub> O <sub>4</sub>     |
| 62 <sup>c</sup> | 6.57 | 6  | [C <sub>30</sub> H <sub>35</sub> O <sub>16</sub> ] <sup>-</sup> | 651.1947 | 2.5  | 13.5 | -                                                                                                                                                                                             | MS <sup>2</sup> [651]: 119.0504, 163.0402                               | Unknown                                            |

|       |      |    |                                                                 |          |      |      |                                                                                                                                                                                                   |                                                      |                                                                                    |
|-------|------|----|-----------------------------------------------------------------|----------|------|------|---------------------------------------------------------------------------------------------------------------------------------------------------------------------------------------------------|------------------------------------------------------|------------------------------------------------------------------------------------|
| 63 °C | 6.64 | 6  | [C <sub>27</sub> H <sub>31</sub> O <sub>17</sub> ] <sup>-</sup> | 627.1545 | 2.1  | 12.5 | -                                                                                                                                                                                                 | MS <sup>2</sup> [627]: 299.0558, 178.9986, 119.0504  | Isomer of Methylsafflorin C or Methylisosafflorin C (X-Glc—C)+(Y-Glc-Glc)          |
| 64 °C | 6.69 | 10 | [C <sub>48</sub> H <sub>51</sub> O <sub>27</sub> ] <sup>-</sup> | 1059.262 | -0.1 | 23.5 | MS <sup>2</sup> [1059]: 939.2216, 1041.2532, 817.1844, 591.1367, 449.1098<br>MS <sup>3</sup> [1059→939]: 817.1831, 799.1727, 654.1229<br>MS <sup>3</sup> [1059→1041]: 919.2156, 757.1624, 879.199 | MS <sup>2</sup> [1059]: 193.0143, 119.0504, 87.056   |                                                                                    |
| 65 °C | 6.70 | 6  | [C <sub>19</sub> H <sub>19</sub> O <sub>10</sub> ] <sup>-</sup> | 407.0986 | 0.6  | 10.5 | MS <sup>2</sup> [407]: 287.0558, 261.0613, 257.0453<br>MS <sup>3</sup> [407→287]: 257.0454, 227.0195, 243.0661                                                                                    | MS <sup>2</sup> [407]: 328.0587, 287.0561, 358.0693  | X-C <sub>4</sub> H <sub>8</sub> O <sub>4</sub>                                     |
| 66 °C | 6.77 | 10 | [C <sub>48</sub> H <sub>53</sub> O <sub>28</sub> ] <sup>-</sup> | 1077.272 | -0.8 | 22.5 | MS <sup>2</sup> [1077]: 1059.2617, 957.2302, 939.2204                                                                                                                                             | MS <sup>2</sup> [1077]: 119.0503, 153.0194, 299.056  | 2X-3Glc-O                                                                          |
| 67 °C | 6.78 | 10 | [C <sub>27</sub> H <sub>29</sub> O <sub>15</sub> ] <sup>-</sup> | 593.1522 | 1.6  | 13.5 | MS <sup>2</sup> [593]: 473.1089, 503.1201, 353.0517<br>MS <sup>3</sup> [593→473]: 323.0565, 403.1039, 413.0729                                                                                    | MS <sup>2</sup> [593]: 119.0504, 205.0144, 473.1092  | Isomer of Safflor Yellow A or Saffloquinoside A                                    |
| 68 °C | 6.80 | 6  | [C <sub>24</sub> H <sub>23</sub> O <sub>13</sub> ] <sup>-</sup> | 519.1149 | 0.9  | 13.5 | MS <sup>2</sup> [519]: 501.1037, 311.056, 287.0560                                                                                                                                                | MS <sup>2</sup> [519]: 119.0504, 187.0401, 257.0455  | X-Glc-C <sub>3</sub> H <sub>2</sub> O <sub>2</sub>                                 |
| 69 °C | 6.88 | 7  | [C <sub>21</sub> H <sub>21</sub> O <sub>11</sub> ] <sup>-</sup> | 449.1089 | -0.1 | 11.5 | MS <sup>2</sup> [449]: 431.0977, 207.0509, 259.061<br>MS <sup>3</sup> [449→431]: 299.0563, 311.0562<br>MS <sup>3</sup> [449→207]: 189.0402, 129.0192, 75.0087                                     | MS <sup>2</sup> [449]: 119.0504, 153.0195, 207.051   | Y-C <sub>3</sub> H <sub>10</sub> O <sub>5</sub>                                    |
| 70 °C | 6.92 | 11 | [C <sub>27</sub> H <sub>29</sub> O <sub>15</sub> ] <sup>-</sup> | 593.1526 | 2.4  | 13.5 | MS <sup>2</sup> [593]: 515.1204, 365.0672, 497.0779<br>MS <sup>3</sup> [593→515]: 365.0668, 347.0563, 497.1093<br>MS <sup>3</sup> [593→365]: 245.0089                                             | MS <sup>2</sup> [593]: 365.0667, 220.0014, 119.0504  | Isomer of Safflor Yellow A or Saffloquinoside A                                    |
| 71 °C | 7.06 | 10 | [C <sub>44</sub> H <sub>41</sub> O <sub>26</sub> ] <sup>-</sup> | 985.1887 | -0.4 | 24.5 | MS <sup>2</sup> [985]: 505.0988, 449.1089, 479.0831<br>MS <sup>3</sup> [985→505]: 297.0404, 461.1091, 271.0612                                                                                    | -                                                    | Unknown (450+536)                                                                  |
| 72 °C | 7.12 | 7  | [C <sub>27</sub> H <sub>31</sub> O <sub>16</sub> ] <sup>-</sup> | 611.1625 | 1.2  | 12.5 | MS <sup>2</sup> [611]: 521.1309, 593.1522, 445.1148, 491.1203<br>MS <sup>3</sup> [611→521]: 503.1193, 313.0718, 358.0693<br>MS <sup>3</sup> [611→593]: 503.1191, 445.1135, 575.1399               | MS <sup>2</sup> [611]: 119.0505, 287.0559, 207.0510  | Isomer of Hydroxysafflor yellow B/C or Safflorin A                                 |
| 73 °C | 7.14 | 6  | [C <sub>22</sub> H <sub>23</sub> O <sub>12</sub> ] <sup>-</sup> | 479.1195 | 0.1  | 11.5 | -                                                                                                                                                                                                 | MS <sup>2</sup> [479]: 119.0504, 145.0296            | Unknown                                                                            |
| 74 °C | 7.18 | 10 | [C <sub>54</sub> H <sub>61</sub> O <sub>33</sub> ] <sup>-</sup> | 1237.312 | 1.6  | 24.5 | MS <sup>2</sup> [1237]: 787.1948, 611.163, 491.1205<br>MS <sup>3</sup> [1237→787]: 667.1521, 697.1623, 505.0991<br>MS <sup>3</sup> [1237→611]: 491.1199, 521.1305, 403.1038                       | MS <sup>2</sup> [1237]: 299.0198, 286.0483, 301.0350 | (X-Glc)+(Y-Glc-Glc-C <sub>4</sub> H <sub>8</sub> O <sub>4</sub> -CO <sub>2</sub> ) |
| 75 °C | 7.43 | 5  | [C <sub>27</sub> H <sub>29</sub> O <sub>14</sub> ] <sup>-</sup> | 577.1566 | 0.5  | 13.5 | MS <sup>2</sup> [577]: 457.1139, 379.0822, 499.1246<br>MS <sup>3</sup> [577→457]: 379.0822<br>MS <sup>3</sup> [577→379]: 259.0248, 273.0405, 285.0405                                             | MS <sup>2</sup> [577]: 259.0248, 379.0823, 119.0504  | X-Glc-C <sub>6</sub> H <sub>8</sub> O <sub>3</sub>                                 |
| 76 °C | 7.84 | 7  | [C <sub>27</sub> H <sub>31</sub> O <sub>16</sub> ] <sup>-</sup> | 611.1630 | 2.1  | 12.5 | MS <sup>2</sup> [611]: 521.1309, 445.1148, 593.1522, 313.0722                                                                                                                                     | -                                                    | Isomer of Hydroxysafflor yellow B/C or Safflorin A                                 |

|       |      |    |                                                                 |           |      |      |                                                                                                                                                                                           |                                                               |                                                     |
|-------|------|----|-----------------------------------------------------------------|-----------|------|------|-------------------------------------------------------------------------------------------------------------------------------------------------------------------------------------------|---------------------------------------------------------------|-----------------------------------------------------|
|       |      |    |                                                                 |           |      |      | MS <sup>3</sup> [611→521]: 503.1199, 313.0720, 358.0696<br>MS <sup>3</sup> [611→445]: 325.0562, 427.1029, 299.0770                                                                        |                                                               |                                                     |
| 77 °C | 7.98 | 10 | [C <sub>48</sub> H <sub>51</sub> O <sub>26</sub> ] <sup>-</sup> | 1043.2683 | 0.9  | 23.5 | MS <sup>2</sup> [1043]: 1025.2582, 923.2264, 593.1523, 449.1099<br>MS <sup>3</sup> [1043→1025]: 863.2048, 1007.2472, 407.0991<br>MS <sup>3</sup> [1043→923]: 905.2142, 715.1665, 475.1252 | MS <sup>2</sup> [1043]: 119.0504, 287.0561, 257.0456          | Isomer of Anhydrosafflor Yellow B                   |
| 78 °C | 8.05 | 7  | [C <sub>33</sub> H <sub>41</sub> O <sub>20</sub> ] <sup>-</sup> | 757.2206  | 1.2  | 13.5 | -                                                                                                                                                                                         | MS <sup>2</sup> [757]: 287.0561, 164.9831, 119.0504           | X-3Glc-O                                            |
| 79 °C | 8.05 | 10 | [C <sub>30</sub> H <sub>33</sub> O <sub>19</sub> ] <sup>-</sup> | 697.120   | -0.2 | 14.5 | MS <sup>2</sup> [697]: 491.1205, 653.1733, 611.1630<br>MS <sup>3</sup> [697→491]: 473.1089, 283.0611, 301.0717<br>MS <sup>3</sup> [697→653]: 491.1200, 533.1307, 445.1144                 | MS <sup>2</sup> [697]: 119.0504, 283.0612, 328.0589, 163.0038 | X-2Glc-C <sub>3</sub> H <sub>2</sub> O <sub>3</sub> |
| 80 °C | 8.19 | 10 | [C <sub>28</sub> H <sub>29</sub> O <sub>18</sub> ] <sup>-</sup> | 653.1371  | 1.9  | 14.5 | MS <sup>2</sup> [653]: 591.1364, 419.0991, 299.0565<br>MS <sup>3</sup> [653→591]: 501.1039, 471.0931<br>MS <sup>3</sup> [653→419]: 299.056                                                | MS <sup>2</sup> [653]: 299.0562, 178.9988, 119.0505           | Y-Glc-C <sub>8</sub> H <sub>8</sub> O <sub>7</sub>  |
| 81 °C | 8.21 | 7  | [C <sub>27</sub> H <sub>31</sub> O <sub>16</sub> ] <sup>-</sup> | 611.1620  | 0.3  | 12.5 | MS <sup>2</sup> [611]: 521.1317, 445.1154, 593.1530<br>MS <sup>3</sup> [611→521]: 503.1198, 313.0718, 358.0694<br>MS <sup>3</sup> [611→445]: 325.0566, 299.0774, 427.1036                 | MS <sup>2</sup> [611]: 119.0506, 287.0565, 358.0699           | Isomer of Hydroxysafflor yellow B/C or Safflomin A  |
| 82 °C | 8.78 | 10 | [C <sub>48</sub> H <sub>51</sub> O <sub>27</sub> ] <sup>-</sup> | 1059.262  | -0.7 | 23.5 | MS <sup>2</sup> [1059]: 731.1626, 593.1521, 1041.2526<br>MS <sup>3</sup> [1059→731]: 713.1521, 523.1046, 283.0616                                                                         | MS <sup>2</sup> [1059]: 119.0504, 257.0456, 136.9882          | (X-Glc-C)+(Y-Glc-Glc)                               |
| 83 °C | 8.81 | 9  | [C <sub>36</sub> H <sub>43</sub> O <sub>23</sub> ] <sup>-</sup> | 843.2194  | -0.7 | 15.5 | MS <sup>2</sup> [843]: 799.2314, 491.1205<br>MS <sup>3</sup> [843→799]: 491.1204, 287.0566, 595.1687                                                                                      | MS <sup>2</sup> [843]: 287.0558, 164.983, 119.0504            | X-3Glc-C <sub>3</sub> H <sub>2</sub> O <sub>2</sub> |
| 84 °C | 8.91 | 10 | [C <sub>30</sub> H <sub>29</sub> O <sub>14</sub> ] <sup>-</sup> | 613.1575  | 1.9  | 16.5 | MS <sup>2</sup> [613]: 551.1567, 361.1085, 595.1466<br>MS <sup>3</sup> [613→551]: 431.0984, 533.1456, 361.1082<br>MS <sup>3</sup> [613→361]: 241.0505, 119.0505                           | MS <sup>2</sup> [613]: 119.0505, 241.0508, 287.0563           | Isomer of SC/ISC                                    |
| 85 °C | 8.96 | 4  | [C <sub>27</sub> H <sub>25</sub> O <sub>14</sub> ] <sup>-</sup> | 573.1248  | -0.4 | 15.5 | MS <sup>2</sup> [573]: 365.0668, 463.0885, 273.0406<br>MS <sup>3</sup> [573→365]: 245.0090, 219.0298, 173.0244                                                                            | MS <sup>2</sup> [573]: 119.0504, 143.0504, 187.0402           | X-Glc-C <sub>8</sub> H <sub>8</sub> O <sub>3</sub>  |
| 86 °C | 9.05 | 10 | [C <sub>30</sub> H <sub>29</sub> O <sub>15</sub> ] <sup>-</sup> | 629.1516  | 0.7  | 16.5 | MS <sup>2</sup> [629]: 419.0984, 437.1088, 299.0562<br>MS <sup>3</sup> [629→419]: 299.0557, 178.9985, 329.0661<br>MS <sup>3</sup> [629→437]: 299.056, 419.0984                            | MS <sup>2</sup> [629]: 178.9989, 299.0566, 119.0505           | Y-Glc-C <sub>8</sub> H <sub>8</sub> O <sub>4</sub>  |
| 87 °C | 9.12 | 10 | [C <sub>29</sub> H <sub>29</sub> O <sub>19</sub> ] <sup>-</sup> | 681.1318  | 1.3  | 15.5 | MS <sup>2</sup> [681]: 663.1213, 619.1316, 407.0991<br>MS <sup>3</sup> [681→663]: 619.131, 407.0988<br>MS <sup>3</sup> [681→619]: 407.0986, 389.088, 287.0562                             | MS <sup>2</sup> [681]: 287.0561, 119.0504, 257.0456           | X-Glc-C <sub>8</sub> H <sub>8</sub> O <sub>8</sub>  |

|                 |      |    |                                                                  |           |      |      |                                                                                                                                                                                 |                                                                 |                                                          |
|-----------------|------|----|------------------------------------------------------------------|-----------|------|------|---------------------------------------------------------------------------------------------------------------------------------------------------------------------------------|-----------------------------------------------------------------|----------------------------------------------------------|
| 88 <sup>c</sup> | 9.16 | 7  | [C <sub>27</sub> H <sub>31</sub> O <sub>16</sub> ] <sup>-</sup>  | 611.1625  | 1.2  | 12.5 | MS <sup>2</sup> [611]: 521.1301, 445.1141, 593.1511<br>MS <sup>3</sup> [611→521]: 503.1201, 313.0719, 358.0696<br>MS <sup>3</sup> [611→445]: 325.0568, 299.0777, 427.1036       | -                                                               | Isomer of Hydroxysafflor yellow B/C or Safflomin A       |
| 89 <sup>c</sup> | 9.16 | 10 | [C <sub>30</sub> H <sub>29</sub> O <sub>14</sub> ] <sup>-</sup>  | 613.1574  | 1.8  | 16.5 | MS <sup>2</sup> [613]: 551.1568, 361.1086<br>MS <sup>3</sup> [613→551]: 431.0979, 533.1453, 361.1078<br>MS <sup>3</sup> [613→361]: 241.0505, 226.0217, 119.0503                 | MS <sup>2</sup> [613]: 119.0505, 241.0508, 287.0562             | Isomer of SC/ISC                                         |
| 90 <sup>c</sup> | 9.31 | 7  | [C <sub>27</sub> H <sub>27</sub> O <sub>14</sub> ] <sup>-</sup>  | 575.1415  | 1.6  | 14.5 | MS <sup>2</sup> [575]: 515.1196, 407.0772, 365.0667<br>MS <sup>3</sup> [575→515]: 347.0562, 365.0668, 351.0723<br>MS <sup>3</sup> [575→407]: 335.0561                           | -                                                               | X-2Glc—2H <sub>2</sub> O                                 |
| 91 <sup>c</sup> | 9.34 | 7  | [C <sub>27</sub> H <sub>29</sub> O <sub>15</sub> ] <sup>-</sup>  | 593.1525  | 2.3  | 13.5 | MS <sup>2</sup> [593]: 503.1196, 575.1407, 473.0939<br>MS <sup>3</sup> [593→503]: 365.05841, 485.1092, 335.0565<br>MS <sup>3</sup> [593→575]: 485.1095                          | MS <sup>2</sup> [611]: 119.0504, 145.0297                       | Isomer of Safflor Yellow A or Saffloquinoside A          |
| 92 <sup>c</sup> | 9.34 | 12 | [C <sub>48</sub> H <sub>51</sub> O <sub>26</sub> ] <sup>-</sup>  | 1043.2682 | 0.8  | 23.5 | MS <sup>2</sup> [1043]: 449.1091, 593.1515, 1025.2565<br>MS <sup>3</sup> [1043→449]: 431.0985, 299.0563, 287.0563<br>MS <sup>3</sup> [1043→593]: 515.1198, 365.0667, 473.1091   | MS <sup>2</sup> [1043]: 286.0485, 119.0505, 449.1093            | Isomer of Anhydrosafflor Yellow B                        |
| 93 <sup>c</sup> | 9.45 | 10 | [C <sub>48</sub> H <sub>51</sub> O <sub>28</sub> ] <sup>-</sup>  | 1075.257  | 0.2  | 23.5 | MS <sup>2</sup> [1075]: 1057.2483, 955.2164, 816.1768                                                                                                                           | MS <sup>2</sup> [1075]: 193.0143, 178.9987, 119.0504            | 2X-2Glc-2CO-C <sub>4</sub> H <sub>8</sub> O <sub>4</sub> |
| 94 <sup>c</sup> | 9.53 | 10 | [C <sub>48</sub> H <sub>51</sub> O <sub>26</sub> ] <sup>-</sup>  | 1043.266  | 2.2  | 23.5 | MS <sup>2</sup> [1043]: 1025.2594, 923.2278, 449.1105<br>MS <sup>3</sup> [1043→1025]: 863.2034, 1007.2465, 772.1646<br>MS <sup>3</sup> [1043→923]: 905.2159, 715.1678, 475.1255 | MS <sup>2</sup> [1043]: 119.0506, 287.0563, 257.0457            | Isomer of Anhydrosafflor Yellow B                        |
| 95 <sup>d</sup> | 9.58 | 10 | [C <sub>48</sub> H <sub>51</sub> O <sub>27</sub> ] <sup>-</sup>  | 1059.2614 | -0.1 | 23.5 | -                                                                                                                                                                               | MS <sup>2</sup> [1059]: 119.0503, 193.0141, 2877.0558, 257.0453 | (X-Glc—C)+(Y-Glc-Glc)                                    |
| 96 <sup>c</sup> | 9.59 | 7  | [C <sub>27</sub> H <sub>31</sub> O <sub>16</sub> ] <sup>-</sup>  | 611.1631  | 2.3  | 12.5 | MS <sup>2</sup> [611]: 521.1302, 593.1512, 445.1142<br>MS <sup>3</sup> [611→521]: 503.1198, 313.0718, 358.0695<br>MS <sup>3</sup> [611→593]: 503.1200, 575.1413, 533.1306       | -                                                               | Isomer of Hydroxysafflor yellow B/C or Safflomin A       |
| 97 <sup>c</sup> | 9.73 | 10 | [C <sub>48</sub> H <sub>51</sub> O <sub>26</sub> ] <sup>-</sup>  | 1043.2680 | 0.1  | 23.5 | MS <sup>2</sup> [1043]: 1025.2578, 923.2261, 449.1096<br>MS <sup>3</sup> [1043→1025]: 863.2047, 1007.2477, 772.1656<br>MS <sup>3</sup> [1043→923]: 905.2163, 475.1258, 715.1678 | MS <sup>2</sup> [1043]: 119.0504, 287.0562, 257.0455            | Isomer of Anhydrosafflor Yellow B                        |
| 98              | 9.80 | 7  | [C <sub>27</sub> H <sub>30</sub> NO <sub>14</sub> ] <sup>-</sup> | 592.1690  | 3.1  | 13.5 | MS <sup>2</sup> [592]: 472.1103, 364.0830, 446.1310<br>MS <sup>3</sup> [592→472]: 244.0251, 286.0355, 364.0670<br>MS <sup>3</sup> [592→364]: 244.0249                           | MS <sup>2</sup> [592]: 233.0331, 364.0826, 339.0749             | Tinctormine                                              |

|        |       |    |                                                                  |           |       |      |                                                                                                                                                                                 |                                                                |                                                       |
|--------|-------|----|------------------------------------------------------------------|-----------|-------|------|---------------------------------------------------------------------------------------------------------------------------------------------------------------------------------|----------------------------------------------------------------|-------------------------------------------------------|
| 99 °C  | 9.87  | 9  | [C <sub>55</sub> H <sub>61</sub> O <sub>33</sub> ] <sup>-</sup>  | 1249.3090 | -1.1  | 25.5 | MS <sup>2</sup> [1249]: 1231.3007, 419.0991, 437.1097                                                                                                                           | MS <sup>2</sup> [1249]: 299.0566, 178.9985, 119.053            | Unknown                                               |
| 100 °C | 10.04 | 8  | [C <sub>48</sub> H <sub>51</sub> O <sub>27</sub> ] <sup>-</sup>  | 1059.2642 | 0.0   | 23.5 | MS <sup>2</sup> [1059]: 1041.2528, 593.1522, 731.1627<br>MS <sup>3</sup> [1059→1041]: 1023.2422, 895.2151, 951.2206<br>MS <sup>3</sup> [1059→593]: 515.1198, 365.0668           | MS <sup>2</sup> [1059]: 119.0505, 257.0457, 136.9883           | (X-Glc—C)+(Y-Glc-Glc)                                 |
| 101 °C | 10.04 | 10 | [C <sub>48</sub> H <sub>51</sub> O <sub>26</sub> ] <sup>-</sup>  | 1043.2697 | 2.2   | 23.5 | MS <sup>2</sup> [1043]: 1025.594, 923.2280, 449.1106<br>MS <sup>3</sup> [1043→1025]: 863.2033, 1007.2465, 772.1649<br>MS <sup>3</sup> [1043→923]: 905.2159, 715.1678, 475.1255  | MS <sup>2</sup> [1043]: 119.0505, 287.0562, 257.0457           | Isomer of Anhydrosafflor Yellow B                     |
| 102    | 10.07 | 7  | [C <sub>27</sub> H <sub>29</sub> O <sub>15</sub> ] <sup>-</sup>  | 593.1526  | 2.5   | 13.5 | MS <sup>2</sup> [593]: 447.1149, 473.0967, 327.0725<br>MS <sup>3</sup> [593→447]: 327.0722, 177.0194, 297.0616<br>MS <sup>3</sup> [593→473]: 177.0192                           | MS <sup>2</sup> [593]: 119.0505, 177.0195, 310.0482            | Safflor Yellow A/<br>Saffloquinoside A                |
| 103 °C | 10.13 | 8  | [C <sub>31</sub> H <sub>29</sub> O <sub>10</sub> ] <sup>-</sup>  | 561.1733  | -2.7  | 17.5 | MS <sup>2</sup> [561]: 373.1249, 441.1146, 353.114<br>MS <sup>3</sup> [561→373]: 253.0828, 223.0723<br>MS <sup>3</sup> [561→441]: 373.1248                                      | MS <sup>2</sup> [561]: 119.0505, 265.083, 223.0725             | Unknown                                               |
| 104 °C | 10.17 | 6  | [C <sub>31</sub> H <sub>32</sub> NO <sub>13</sub> ] <sup>-</sup> | 626.1884  | 0.7   | 16.5 | MS <sup>2</sup> [626]: 461.1091, 449.1093<br>MS <sup>3</sup> [626→461]: 341.0513                                                                                                | MS <sup>2</sup> [626]: 298.0482, 341.0514, 178.9987            | X-Glc-C <sub>10</sub> H <sub>11</sub> NO <sub>2</sub> |
| 105 °C | 10.18 | 10 | [C <sub>48</sub> H <sub>51</sub> O <sub>27</sub> ] <sup>-</sup>  | 1059.263  | -0.12 | 23.5 | MS <sup>2</sup> [1059]: 731.1631, 1041.2533, 833.1948<br>MS <sup>3</sup> [1059→731]: 713.1523, 523.1047, 283.0617<br>MS <sup>3</sup> [1059→1041]: 1023.2406, 879.1987, 921.2101 | MS <sup>2</sup> [1059]: 119.0504, 257.0456, 136.9882, 287.0561 | (X-Glc—C)+(Y-Glc-Glc)                                 |
| 106 °C | 10.23 | 8  | [C <sub>27</sub> H <sub>30</sub> NO <sub>13</sub> ] <sup>-</sup> | 576.1737  | 2.52  | 13.5 | MS <sup>2</sup> [576]: 449.1098, 388.1256, 430.1364<br>MS <sup>3</sup> [576→449]: 431.0983, 299.0562, 287.0562<br>MS <sup>3</sup> [576→388]: 261.0614, 344.1348                 | MS <sup>2</sup> [576]: 119.0505, 240.0879, 287.0562            | Y-Glc-C <sub>5</sub> H <sub>9</sub> NO <sub>2</sub>   |
| 107 °C | 10.35 | 7  | [C <sub>30</sub> H <sub>29</sub> O <sub>15</sub> ] <sup>-</sup>  | 629.1524  | 1.9   | 16.5 | MS <sup>2</sup> [629]: 419.0989, 437.193, 299.0564<br>MS <sup>3</sup> [629→419]: 299.0563<br>MS <sup>3</sup> [629→437]: 299.0557, 419.0976                                      | MS <sup>2</sup> [629]: 119.0504, 178.9987, 299.0561            | Y-Glc-C <sub>8</sub> H <sub>8</sub> O <sub>4</sub>    |
| 108 °C | 10.35 | 10 | [C <sub>30</sub> H <sub>29</sub> O <sub>15</sub> ] <sup>-</sup>  | 629.1528  | 2.5   | 16.5 | MS <sup>2</sup> [629]: 419.0991, 437.1096, 299.0565<br>MS <sup>3</sup> [629→419]: 299.0561, 329.0667, 178.9987<br>MS <sup>3</sup> [629→437]: 299.0564, 419.0988, 269.0458       | MS <sup>2</sup> [629]: 119.0505, 178.9988, 299.0562            | Y-Glc-C <sub>8</sub> H <sub>8</sub> O <sub>4</sub>    |
| 109 °C | 10.41 | 8  | [C <sub>24</sub> H <sub>26</sub> NO <sub>12</sub> ] <sup>-</sup> | 520.1465  | 0.8   | 12.5 | MS <sup>2</sup> [520]: 332.0989, 400.0889, 312.088<br>MS <sup>3</sup> [520→332]: 212.0563, 182.0458, 302.0876<br>MS <sup>3</sup> [520→400]: 332.0986                            | MS <sup>2</sup> [520]: 119.0504, 182.046, 194.046              | Z-Glc-C <sub>3</sub> H <sub>4</sub> O <sub>2</sub>    |
| 110 °C | 10.45 | 8  | [C <sub>25</sub> H <sub>26</sub> NO <sub>14</sub> ] <sup>-</sup> | 564.1368  | 1.6   | 13.5 | -                                                                                                                                                                               | MS <sup>2</sup> [564]: 119.0503, 194.0457, 182.0458            | Unknown                                               |

|        |       |    |                                                                  |          |      |      |                                                                                                                                                                                               |                                                      |                                                      |
|--------|-------|----|------------------------------------------------------------------|----------|------|------|-----------------------------------------------------------------------------------------------------------------------------------------------------------------------------------------------|------------------------------------------------------|------------------------------------------------------|
| 111 °C | 10.57 | 4  | [C <sub>27</sub> H <sub>31</sub> O <sub>14</sub> ] <sup>-</sup>  | 579.1724 | 0.8  | 12.5 | MS <sup>2</sup> [579]: 271.0610<br>MS <sup>3</sup> [579→271]: 151.0035, 177.0191                                                                                                              | MS <sup>2</sup> [579]: 271.0613, 151.0038, 119.0504  | X-2Glc-2O                                            |
| 112 °C | 10.57 | 12 | [C <sub>21</sub> H <sub>21</sub> O <sub>11</sub> ] <sup>-</sup>  | 449.1099 | 2.1  | 11.5 | MS <sup>2</sup> [449]: 431.0985, 299.0562, 287.0562, 207.0510<br>MS <sup>3</sup> [449→431]: 299.0560, 311.0559, 281.0454, 413.0877<br>MS <sup>3</sup> [449→299]: 178.9984, 255.0660, 271.0610 | MS <sup>2</sup> [449]: 119.0505, 286.0484, 153.0195, | Y-C <sub>3</sub> H <sub>10</sub> O <sub>5</sub>      |
| 113 °C | 10.58 | 9  | [C <sub>54</sub> H <sub>61</sub> O <sub>31</sub> ] <sup>-</sup>  | 1205.326 | 0.5  | 24.5 | MS <sup>2</sup> [1205]: 449.1092, 491.1198, 611.162<br>MS <sup>3</sup> [1205→449]: 299.0564, 431.0986, 287.0565<br>MS <sup>3</sup> [1205→491]: 473.109, 283.0612, 328.0588                    | MS <sup>2</sup> [1205]: 119.0504, 286.0482, 153.0195 | (X-Glc-Glc OH)+(X-Glc-Glc) —                         |
| 114 °C | 10.59 | 10 | [C <sub>39</sub> H <sub>35</sub> O <sub>14</sub> ] <sup>-</sup>  | 727.1999 | -4.6 | 22.5 | MS <sup>2</sup> [727]: 595.1473, 709.1901, 539.1534<br>MS <sup>3</sup> [727→595]: 427.0828, 475.0887, 449.1094<br>MS <sup>3</sup> [727→709]: 577.1351, 692.1623, 589.1466                     | MS <sup>2</sup> [727]: 119.0505, 131.0465, 241.0507  | Y-Glc-C <sub>17</sub> H <sub>14</sub> O <sub>3</sub> |
| 115 °C | 10.67 | 12 | [C <sub>22</sub> H <sub>22</sub> NO <sub>11</sub> ] <sup>-</sup> | 476.1202 | 0.7  | 12.5 | MS <sup>2</sup> [476]: 356.0624, 458.1097, 268.0617, 288.0726<br>MS <sup>3</sup> [476→491]: 288.0722, 168.0302, 338.0515<br>MS <sup>3</sup> [476→473]: 326.0667, 338.0668, 308.0562           | MS <sup>2</sup> [476]: 119.0505, 180.0304, 168.0304  | Z-Glc-CO                                             |
| 116 °C | 10.83 | 10 | [C <sub>40</sub> H <sub>37</sub> O <sub>14</sub> ] <sup>-</sup>  | 741.2161 | -3.8 | 22.5 | MS <sup>2</sup> [741]: 553.1689, 723.2059, 603.1634<br>MS <sup>3</sup> [741→553]: 287.0778, 407.0989, 459.1263<br>MS <sup>3</sup> [741→723]: 603.1631, 577.1362, 705.1948                     | MS <sup>2</sup> [741]: 145.0621, 119.0505, 241.0508  | X-Glc-C <sub>19</sub> H <sub>16</sub> O <sub>3</sub> |
| 117    | 10.89 | 7  | [C <sub>27</sub> H <sub>29</sub> O <sub>15</sub> ] <sup>-</sup>  | 593.1523 | 1.9  | 13.5 | MS <sup>2</sup> [593]: 473.0939, 447.1145, 503.1197<br>MS <sup>3</sup> [593→473]: 405.1039, 285.0616<br>MS <sup>3</sup> [593→447]: 297.062                                                    | MS <sup>2</sup> [593]: 119.0503, 405.0979, 241.0506  | Safflor Yellow A/<br>Saffloquinoside A               |
| 118 °C | 10.90 | 10 | [C <sub>48</sub> H <sub>51</sub> O <sub>27</sub> ] <sup>-</sup>  | 1059.264 | 1.5  | 23.5 | MS <sup>2</sup> [1059]: 731.163, 465.1049, 1041.2532<br>MS <sup>3</sup> [1059→31]: 713.1519, 523.1042, 283.0616<br>MS <sup>3</sup> [1059→465]: 447.0925, 297.0401, 315.0506                   | MS <sup>2</sup> [1059]: 119.0504, 287.056, 257.0455  | (X-Glc—C)+(Y-Glc-Glc)                                |
| 119 °C | 11.01 | 10 | [C <sub>27</sub> H <sub>26</sub> NO <sub>14</sub> ] <sup>-</sup> | 588.1372 | 0.7  | 15.5 | -                                                                                                                                                                                             | MS <sup>2</sup> [588]: 248.0562, 119.0504, 269.0453  | Unknown                                              |
| 120 °C | 11.07 | 5  | [C <sub>22</sub> H <sub>21</sub> O <sub>12</sub> ] <sup>-</sup>  | 477.1038 | -0.1 | 12.5 | MS <sup>2</sup> [477]: 459.0938, 287.0564, 269.0458<br>MS <sup>3</sup> [477→459]: 339.0508, 327.0508, 271.0612<br>MS <sup>3</sup> [477→287]: 257.0453                                         | MS <sup>2</sup> [477]: 119.0504, 314.0432, 269.0456  | X-Glc-CO                                             |
| 121 °C | 11.25 | 8  | [C <sub>25</sub> H <sub>28</sub> NO <sub>12</sub> ] <sup>-</sup> | 534.1628 | 2.16 | 12.5 | MS <sup>2</sup> [534]: 346.1148, 414.1049, 326.1039<br>MS <sup>3</sup> [534→346]: 266.072, 302.088, 182.0459<br>MS <sup>3</sup> [534→414]: 346.1141                                           | MS <sup>2</sup> [534]: 119.0504, 194.0459, 182.0459  | X-Glc-C <sub>4</sub> H <sub>7</sub> NO               |

|        |       |    |                                                                  |           |      |      |                                                                                                                                                                                  |                                                                                              |                                                                               |
|--------|-------|----|------------------------------------------------------------------|-----------|------|------|----------------------------------------------------------------------------------------------------------------------------------------------------------------------------------|----------------------------------------------------------------------------------------------|-------------------------------------------------------------------------------|
| 122 °c | 11.51 | 10 | [C <sub>29</sub> H <sub>27</sub> O <sub>18</sub> ] <sup>-</sup>  | 663.1215  | 1.8  | 16.5 | MS <sup>2</sup> [663]: 619.1315, 407.0992<br>MS <sup>3</sup> [663→619]: 407.0988, 389.0882, 287.0564<br>MS <sup>3</sup> [663→403]: 287.0561, 257.0455, 261.0615                  | MS <sup>2</sup> [663]: 287.0562, 119.0505, 257.0456                                          | X-Glc-C <sub>8</sub> H <sub>6</sub> O <sub>7</sub>                            |
| 123    | 11.55 | 5  | [C <sub>27</sub> H <sub>28</sub> NO <sub>13</sub> ] <sup>-</sup> | 574.1574  | 1.4  | 14.5 | MS <sup>2</sup> [574]: 454.0993, 424.1040, 466.1145<br>MS <sup>3</sup> [574→454]: 304.0461, 346.0565, 436.0882<br>MS <sup>3</sup> [574→424]: 364.0821                            | MS <sup>2</sup> [574]: 364.0826, 338.067, 244.0252                                           | Cartormine                                                                    |
| 124 °c | 11.66 | 5  | [C <sub>27</sub> H <sub>28</sub> NO <sub>14</sub> ] <sup>-</sup> | 590.1521  | 1.0  | 14.5 | MS <sup>2</sup> [590]: 530.1312, 470.0947, 410.0735<br>MS <sup>3</sup> [590→530]: 410.0726, 380.0772, 512.1194<br>MS <sup>3</sup> [590→470]: 410.0732                            | MS <sup>2</sup> [590]: 230.0095, 260.02, 367.0697                                            | Z-Glc-C <sub>6</sub> H <sub>6</sub> O <sub>4</sub>                            |
| 125 °c | 11.69 | 5  | [C <sub>28</sub> H <sub>29</sub> O <sub>17</sub> ] <sup>-</sup>  | 637.1409  | -0.1 | 14.5 | MS <sup>2</sup> [637]: 619.1315, 575<br>MS <sup>3</sup> [637→619]: 575.1406, 601.1197, 287.0562                                                                                  | MS <sup>2</sup> [637]: 119.0505, 287.0561, 338.0432                                          | X-Glc-C <sub>7</sub> H <sub>8</sub> O <sub>6</sub>                            |
| 126 °c | 11.84 | 5  | [C <sub>30</sub> H <sub>29</sub> O <sub>13</sub> ] <sup>-</sup>  | 597.1619  | 1.0  | 16.5 | MS <sup>2</sup> [597]: 477.1197, 507.1302, 579.1514<br>MS <sup>3</sup> [597→477]: 313.0722, 339.0878<br>MS <sup>3</sup> [597→507]: 369.0982, 343.0826                            | MS <sup>2</sup> [597]: 313.0718, 119.0504, 339.0874                                          | X-Glc-C <sub>9</sub> H <sub>8</sub> O <sub>2</sub>                            |
| 127 °c | 11.98 | 10 | [C <sub>48</sub> H <sub>51</sub> O <sub>27</sub> ] <sup>-</sup>  | 1059.2630 | 0.2  | 23.5 | MS <sup>2</sup> [1059]: 621.1474, 1041.2532, 651.1579<br>MS <sup>3</sup> [1059→621]: 501.1044, 603.1361, 531.1149<br>MS <sup>3</sup> [1059→1041]: 595.1674, 407.0987, 287.0564   | MS <sup>2</sup> [1059]: 119.0505, 299.056, 178.9987                                          | (X-Glc—C)+(Y-Glc-Glc)                                                         |
| 128 °d | 12.13 | 11 | [C <sub>50</sub> H <sub>51</sub> O <sub>30</sub> ] <sup>-</sup>  | 1131.2480 | 2.0  | 25.5 | MS <sup>2</sup> [1131]: 1113.2384, 505.1003, 637.1428<br>MS <sup>3</sup> [1131→1113]: 1095.228, 625.1424, 949.1906<br>MS <sup>3</sup> [1131→505]: 297.0406, 461.1093, 271.0614   | MS <sup>2</sup> [1131]: 625.1414, 463.0886, 299.0199, 271.0250, 187.0402, 151.0039, 119.0505 | (C <sub>17</sub> H <sub>12</sub> O <sub>8</sub> -Glc)+(quercetin-Glc-Glc)     |
| 129 °d | 12.25 | 10 | [C <sub>56</sub> H <sub>61</sub> O <sub>34</sub> ] <sup>-</sup>  | 1277.3070 | 1.4  | 26.5 | MS <sup>2</sup> [1277]: 1259.2957, 505.0999, 783.2001<br>MS <sup>3</sup> [1277→1259]: 1241.2847, 1095.2477, 771.1996<br>MS <sup>3</sup> [1277→505]: 297.0401, 461.1084, 271.0609 | MS <sup>2</sup> [1277]: 119.0504, 301.0358, 151.0039, 771.1971                               | (C <sub>17</sub> H <sub>12</sub> O <sub>8</sub> -Glc)+(quercetin-Glc-Rha-Glc) |
| 130 °c | 12.44 | 4  | [C <sub>30</sub> H <sub>27</sub> O <sub>14</sub> ] <sup>-</sup>  | 611.1414  | 1.3  | 17.5 | MS <sup>2</sup> [611]: 403.0826, 421.0930, 593.1304<br>MS <sup>3</sup> [611→403]: 283.0243, 361.0710, 241.0139<br>MS <sup>3</sup> [611→421]: 275.0560, 257.0455, 377.1029        | MS <sup>2</sup> [611]: 119.0505, 187.0402                                                    | Isomer of Hydroxysafflor yellow A                                             |
| 131 °c | 12.46 | 8  | [C <sub>24</sub> H <sub>26</sub> NO <sub>11</sub> ] <sup>-</sup> | 504.1514  | 0.6  | 12.5 | MS <sup>2</sup> [504]: 316.1041, 384.0941, 486.1412<br>MS <sup>3</sup> [504→316]: 196.0614<br>MS <sup>3</sup> [504→384]: 316.1036, 196.0615                                      | MS <sup>2</sup> [504]: 119.0504, 208.0615, 196.0615                                          | Z-Glc-C <sub>3</sub> H <sub>4</sub> O                                         |
| 132 °c | 12.46 | 9  | [C <sub>41</sub> H <sub>41</sub> O <sub>21</sub> ] <sup>-</sup>  | 869.2139  | -0.7 | 21.5 | MS <sup>2</sup> [869]: 851.2053, 593.1525, 473.1099                                                                                                                              | MS <sup>2</sup> [869]: 119.0504, 136.9882, 257.0455                                          | 2X-Glc-C <sub>3</sub> H <sub>6</sub> O <sub>4</sub>                           |

|                  |       |    |                                                                 |           |      |      |                                                                                                                                                                                |                                                      |                                                                           |
|------------------|-------|----|-----------------------------------------------------------------|-----------|------|------|--------------------------------------------------------------------------------------------------------------------------------------------------------------------------------|------------------------------------------------------|---------------------------------------------------------------------------|
|                  |       |    |                                                                 |           |      |      | MS <sup>3</sup> [869→851]: 705.167, 833.193, 689.1509<br>MS <sup>3</sup> [869→593]: 515.1201, 365.0669                                                                         |                                                      |                                                                           |
| 133 <sup>c</sup> | 12.53 | 9  | [C <sub>48</sub> H <sub>51</sub> O <sub>27</sub> ] <sup>-</sup> | 1059.263  | 0.7  | 23.5 | MS <sup>2</sup> [1059]: 731.162, 1041.2517, 851.2042<br>MS <sup>3</sup> [1059→731]: 713.1514, 523.1038, 283.0614<br>MS <sup>3</sup> [1059→1041]: 909.2147, 1023.2403           | MS <sup>2</sup> [1059]: 119.0504, 287.0561, 257.0455 | (X-Glc—C)+(Y-Glc-Glc)                                                     |
| 134 <sup>c</sup> | 12.58 | 6  | [C <sub>23</sub> H <sub>23</sub> O <sub>12</sub> ] <sup>-</sup> | 491.1203  | 1.6  | 12.5 | MS <sup>2</sup> [491]: 287.0558, 431.0987<br>MS <sup>3</sup> [491→287]: 181.0142, 166.9986, 153.0194<br>MS <sup>3</sup> [491→431]: 287.056, 311.0409, 329.0665                 | MS <sup>2</sup> [491]: 286.0491, 166.9989, 153.0197  | X-Glc-C <sub>2</sub> H <sub>2</sub> O                                     |
| 135 <sup>b</sup> | 12.59 | 8  | [C <sub>48</sub> H <sub>51</sub> O <sub>26</sub> ] <sup>-</sup> | 1043.265  | -2.4 | 23.5 | MS <sup>2</sup> [1043]: 1025.2603, 923.2287, 449.1109<br>MS <sup>3</sup> [1043→1025]: 963.2044, 1007.2481, 772.1661<br>MS <sup>3</sup> [1043→923]: 905.2157, 715.1677          | MS <sup>2</sup> [1043]: 119.0506, 287.0565, 257.0459 | Anhydrosafflor Yellow B                                                   |
| 136 <sup>c</sup> | 12.65 | 9  | [C <sub>48</sub> H <sub>51</sub> O <sub>26</sub> ] <sup>-</sup> | 1043.269  | 1.5  | 23.5 | MS <sup>2</sup> [1043]: 1025.2594, 923.228, 449.1105<br>MS <sup>3</sup> [1043→1025]: 863.2045, 1007.2478, 772.1658<br>MS <sup>3</sup> [1043→923]: 905.2157                     | MS <sup>2</sup> [1043]: 119.0505, 287.0566, 257.0457 | Isomer of Anhydrosafflor Yellow B                                         |
| 137              | 13.22 | 10 | [C <sub>48</sub> H <sub>53</sub> O <sub>27</sub> ] <sup>-</sup> | 1061.22   | 2.2  | 22.5 | MS <sup>2</sup> [1061]: 611.1632, 449.1101, 507.1368<br>MS <sup>3</sup> [1061→611]: 491.1198, 521.1304, 403.1037<br>MS <sup>3</sup> [1061→449]: 431.0978, 299.0561, 287.0562   | MS <sup>2</sup> [1061]: 153.0196, 179.0352, 221.0457 | Safflor yellow B                                                          |
| 138 <sup>c</sup> | 13.38 | 4  | [C <sub>42</sub> H <sub>48</sub> O <sub>12</sub> ] <sup>-</sup> | 744.3135  | -1.3 | 19   | MS <sup>2</sup> [744]: 582.2615, 462.2039<br>MS <sup>3</sup> [744→582]: 462.2039, 342.1461, 436.2245<br>MS <sup>3</sup> [744→462]: 342.1462                                    | MS <sup>2</sup> [744]: 119.0504, 145.0296, 342.1456  | Unknown                                                                   |
| 139 <sup>d</sup> | 13.48 | 10 | [C <sub>44</sub> H <sub>41</sub> O <sub>25</sub> ] <sup>-</sup> | 969.1965  | 2.4  | 24.5 | MS <sup>2</sup> [969]: 505.0999, 951.1848, 297.0409<br>MS <sup>3</sup> [969→505]: 297.04063, 461.1087, 271.0612<br>MS <sup>3</sup> [969→951]: 933.1741, 787.137, 463.089       | MS <sup>2</sup> [969]: 119.0505, 300.0277, 151.0039  | (C <sub>17</sub> H <sub>12</sub> O <sub>8</sub> -Glc)+(quercetin-Glc)     |
| 140 <sup>c</sup> | 13.53 | 4  | [C <sub>42</sub> H <sub>48</sub> O <sub>12</sub> ] <sup>-</sup> | 744.3135  | -2.2 | 19   | MS <sup>2</sup> [744]: 582.2621, 462.2044<br>MS <sup>3</sup> [744→582]: 462.2033, 342.1458, 436.2240                                                                           | MS <sup>2</sup> [744]: 119.0503, 342.1458, 145.0296  | Unknown                                                                   |
| 141 <sup>d</sup> | 13.54 | 10 | [C <sub>50</sub> H <sub>51</sub> O <sub>29</sub> ] <sup>-</sup> | 1115.2544 | 2.0  | 25.5 | MS <sup>2</sup> [1115]: 505.0991, 1097.2417, 461.1093<br>MS <sup>3</sup> [1115→505]: 297.0407, 461.109, 271.0615<br>MS <sup>3</sup> [1115→1097]: 1079.2301, 933.1942, 609.1464 | MS <sup>2</sup> [1115]: 119.0504, 301.0355, 151.0039 | (C <sub>17</sub> H <sub>12</sub> O <sub>8</sub> -Glc)+(quercetin-Glc-Rha) |
| 142 <sup>c</sup> | 13.59 | 9  | [C <sub>48</sub> H <sub>51</sub> O <sub>27</sub> ] <sup>-</sup> | 1059.2630 | 0.6  | 23.5 | MS <sup>2</sup> [1059]: 621.1473, 1041.2531, 827.2263<br>MS <sup>3</sup> [1059→621]: 501.1046, 603.1362, 513.1047                                                              | MS <sup>2</sup> [1059]: 119.0503, 299.0558, 178.9986 | (X-Glc—C)+(Y-Glc-Glc)                                                     |



|                  |       |    |                                                                  |           |      |      |                                                                                                                                                                                                                                          |                                                      |                                                                                         |
|------------------|-------|----|------------------------------------------------------------------|-----------|------|------|------------------------------------------------------------------------------------------------------------------------------------------------------------------------------------------------------------------------------------------|------------------------------------------------------|-----------------------------------------------------------------------------------------|
| 143 <sup>d</sup> | 13.72 | 9  | [C <sub>55</sub> H <sub>61</sub> O <sub>32</sub> ] <sup>-</sup>  | 1233.315  | -0.6 | 25.5 | MS <sup>2</sup> [1059→1041]: 621.1473, 419.0992, 921.215<br>MS <sup>2</sup> [1233]: 771.1989, 461.1092, 609.1463<br>MS <sup>3</sup> [1233→771]: 609.1472, 301.0358, 463.0889<br>MS <sup>3</sup> [1233→461]: 271.0612, 151.0038, 253.0506 | MS <sup>2</sup> [1233]: 301.0356, 119.0504, 271.0251 | (Y-Glc)+(quercetin-Glc-Glc-Rha)                                                         |
| 144 <sup>c</sup> | 13.78 | 10 | [C <sub>50</sub> H <sub>51</sub> O <sub>28</sub> ] <sup>-</sup>  | 1099.257  | -0.5 | 25.5 | MS <sup>2</sup> [1099]: 1081.2458, 505.0989, 1037.2566<br>MS <sup>3</sup> [1099→1081]: 1063.2368, 917.1993, 1037.2583<br>MS <sup>3</sup> [1099→505]: 297.0403, 461.1086, 271.0612                                                        | MS <sup>2</sup> [1099]: 119.0505, 284.0327, 151.0039 | (C <sub>17</sub> H <sub>12</sub> O <sub>8</sub> -Glc)+(X-Glc-Glc-H <sub>2</sub> O)      |
| 145 <sup>b</sup> | 13.90 | 7  | [C <sub>30</sub> H <sub>29</sub> O <sub>14</sub> ] <sup>-</sup>  | 613.1558  | -0.8 | 16.5 | MS <sup>2</sup> [613]: 551.1573, 361.1089, 595.1471<br>MS <sup>3</sup> [613→551]: 431.0986, 533.1459, 361.1083<br>MS <sup>3</sup> [613→361]: 241.0503                                                                                    | MS <sup>2</sup> [613]: 119.0509, 241.0507, 287.0570  | Isosafflomin C                                                                          |
| 146 <sup>d</sup> | 14.01 | 10 | [C <sub>50</sub> H <sub>51</sub> O <sub>29</sub> ] <sup>-</sup>  | 1115.254  | 1.8  | 25.5 | MS <sup>2</sup> [1115]: 1097.2429, 1053.2533, 505.0999<br>MS <sup>3</sup> [1115→1097]: 909.1941, 649.1412, 959.1889<br>MS <sup>3</sup> [1115→1053]: 717.167, 1035.2413, 743.1462                                                         | MS <sup>2</sup> [1115]: 300.0279, 119.0504, 151.0038 | (C <sub>17</sub> H <sub>12</sub> O <sub>8</sub> -Glc)+(quercetin-Glc-Rha)               |
| 147 <sup>b</sup> | 14.07 | 7  | [C <sub>30</sub> H <sub>29</sub> O <sub>14</sub> ] <sup>-</sup>  | 613.1572  | 1.6  | 16.5 | MS <sup>2</sup> [613]: 361.109, 551.1574, 425.11<br>MS <sup>3</sup> [613→361]: 241.0505, 119.0503<br>MS <sup>3</sup> [613→551]: 431.098, 533.1451, 361.1078                                                                              | -                                                    | Safflomin C                                                                             |
| 148 <sup>d</sup> | 14.12 | 8  | [C <sub>49</sub> H <sub>51</sub> O <sub>28</sub> ] <sup>-</sup>  | 1087.259  | 1.8  | 24.5 | MS <sup>2</sup> [1087]: 625.1422, 461.1100<br>MS <sup>3</sup> [1087→625]: 463.0886, 301.0355<br>MS <sup>3</sup> [1087→461]: 271.0616, 151.0039                                                                                           | MS <sup>2</sup> [1087]: 299.096, 271.0247, 463.0877  | (Y-Glc)+(quercetin-Glc-Glc)                                                             |
| 149 <sup>c</sup> | 14.14 | 10 | [C <sub>35</sub> H <sub>36</sub> NO <sub>15</sub> ] <sup>-</sup> | 710.2095  | 0.6  | 18.5 | MS <sup>2</sup> [710]: 595.1471, 522.1629, 387.0883<br>MS <sup>3</sup> [710→595]: 427.0828, 475.0887, 449.1094<br>MS <sup>3</sup> [710→522]: 407.0987, 287.0563, 428.1201                                                                | MS <sup>2</sup> [710]: 119.0504, 241.0506, 287.056   | Y-Glc-C <sub>13</sub> H <sub>15</sub> NO <sub>4</sub>                                   |
| 150 <sup>c</sup> | 14.17 | 7  | [C <sub>41</sub> H <sub>39</sub> O <sub>21</sub> ] <sup>-</sup>  | 867.1986  | -0.4 | 22.5 | MS <sup>2</sup> [867]: 459.0933, 287.0563, 849.1882, 407.0984                                                                                                                                                                            | MS <sup>2</sup> [867]: 119.0504, 287.0561, 257.0455  | (X-Glc-C <sub>2</sub> H <sub>2</sub> O)+C <sub>22</sub> H <sub>19</sub> O <sub>11</sub> |
| 151 <sup>c</sup> | 14.19 | 8  | [C <sub>48</sub> H <sub>51</sub> O <sub>27</sub> ] <sup>-</sup>  | 1059.265  | 2.2  | 23.5 | MS <sup>2</sup> [1059]: 621.1475, 1041.2535, 827.2267<br>MS <sup>3</sup> [1059→621]: 603.136, 501.1044, 513.1044<br>MS <sup>3</sup> [1059→1041]: 621.1474                                                                                | MS <sup>2</sup> [1059]: 119.0505, 287.0564, 299.0564 | (X-Glc-C)+(Y-Glc-Glc)                                                                   |
| 152 <sup>c</sup> | 14.23 | 7  | [C <sub>30</sub> H <sub>30</sub> NO <sub>12</sub> ] <sup>-</sup> | 596.1776  | 0.3  | 16.5 | MS <sup>2</sup> [596]: 450.1413, 476.1205, 408.1306<br>MS <sup>3</sup> [596→450]: 300.0879, 286.0722, 342.0985<br>MS <sup>3</sup> [596→476]: 408.1302, 432.1303, 288.0879                                                                | MS <sup>2</sup> [596]: 119.0504, 244.098, 300.0877   | Z-Glc-C <sub>9</sub> H <sub>8</sub> O <sub>2</sub>                                      |
| 153 <sup>c</sup> | 14.27 | 10 | [C <sub>51</sub> H <sub>53</sub> O <sub>29</sub> ] <sup>-</sup>  | 1129.2700 | 1.8  | 25.5 | MS <sup>2</sup> [1129]: 1111.2585, 505.0999<br>MS <sup>3</sup> [1129→1111]: 1093.2462, 947.2098                                                                                                                                          | MS <sup>2</sup> [1129]: 119.0503, 151.0037, 314.0427 | 2X-3Glc-C <sub>3</sub> H <sub>2</sub> O <sub>2</sub> -2H                                |

|        |       |    |                                                                  |           |     |      |                                                                                                                                                                           |                                                      |                                                                                                                |
|--------|-------|----|------------------------------------------------------------------|-----------|-----|------|---------------------------------------------------------------------------------------------------------------------------------------------------------------------------|------------------------------------------------------|----------------------------------------------------------------------------------------------------------------|
| 154 °C | 14.32 | 7  | [C <sub>26</sub> H <sub>30</sub> NO <sub>11</sub> ] <sup>-</sup> | 532.1839  | 2.8 | 12.5 | MS <sup>2</sup> [532]: 344.1352, 324.1242, 412.1251<br>MS <sup>3</sup> [532→344]: 224.0926, 194.0821<br>MS <sup>3</sup> [532→324]: 204.0665, 119.0503, 132.082            | -                                                    | X-Glc-C <sub>5</sub> H <sub>9</sub> N                                                                          |
| 155 °C | 14.61 | 10 | [C <sub>41</sub> H <sub>32</sub> NO <sub>13</sub> ] <sup>-</sup> | 746.1895  | 2.1 | 26.5 | MS <sup>2</sup> [746]: 553.1357, 449.1092, 921.2307<br>MS <sup>3</sup> [746→553]: 363.0873, 535.1249, 345.0769<br>MS <sup>3</sup> [746→449]: 299.0562, 431.0984, 287.0562 | MS <sup>2</sup> [746]: 119.0505, 287.0562, 257.0457  | X-Y-C <sub>11</sub> H <sub>10</sub> NO                                                                         |
| 156 °C | 14.70 | 8  | [C <sub>44</sub> H <sub>43</sub> O <sub>24</sub> ] <sup>-</sup>  | 955.2169  | 2.0 | 23.5 | -                                                                                                                                                                         | MS <sup>2</sup> [955]: 119.0504, 286.0484, 151.0039  | Isomer of Precarthamin                                                                                         |
| 157 °C | 14.76 | 7  | [C <sub>27</sub> H <sub>32</sub> NO <sub>11</sub> ] <sup>-</sup> | 546.1992  | 2.1 | 12.5 | MS <sup>2</sup> [546]: 426.1408, 358.1509, 338.14<br>MS <sup>3</sup> [546→426]: 358.1503, 238.1084<br>MS <sup>3</sup> [546→358]: 238.1083                                 | MS <sup>2</sup> [546]: 119.0504, 250.1086, 208.0981  | X-Glc-C <sub>6</sub> H <sub>11</sub> N                                                                         |
| 158 °C | 14.79 | 7  | [C <sub>43</sub> H <sub>43</sub> O <sub>22</sub> ] <sup>-</sup>  | 911.2270  | 2.0 | 22.5 | MS <sup>2</sup> [911]: 461.1098, 449.1099<br>MS <sup>3</sup> [911→461]: 443.0974<br>MS <sup>3</sup> [911→449]: 431.0984                                                   | MS <sup>2</sup> [911]: 286.0481, 119.0503, 151.0037  | (X-Glc)+(Y-Glc)                                                                                                |
| 159 °C | 14.91 | 7  | [C <sub>30</sub> H <sub>30</sub> NO <sub>11</sub> ] <sup>-</sup> | 580.1831  | 1.2 | 16.5 | MS <sup>2</sup> [580]: 460.1255, 392.1355, 372.1246<br>MS <sup>3</sup> [580→460]: 392.1353, 272.0932<br>MS <sup>3</sup> [580→392]: 272.0926, 242.082                      | MS <sup>2</sup> [580]: 119.0504, 284.0925, 242.0821  | Z-Glc-C <sub>9</sub> H <sub>8</sub> O                                                                          |
| 160 °C | 15.07 | 7  | [C <sub>50</sub> H <sub>53</sub> O <sub>27</sub> ] <sup>-</sup>  | 1085.2790 | 0.7 | 24.5 | MS <sup>2</sup> [1085]: 461.1091, 449.1091, 1067.2671<br>MS <sup>3</sup> [1085→461]: 271.0612<br>MS <sup>3</sup> [1085→449]: 431.0984, 299.0561, 287.0562                 | MS <sup>2</sup> [1085]: 119.0505, 299.0202, 151.0039 | (Y-Glc)+(Y-Glc-Glc)                                                                                            |
| 161 °C | 15.16 | 9  | [C <sub>44</sub> H <sub>43</sub> O <sub>24</sub> ] <sup>-</sup>  | 955.2167  | 1.8 | 23.5 | MS <sup>2</sup> [955]: 505.0993, 297.0408, 937.2048<br>MS <sup>3</sup> [955→505]: 461.1094, 297.0407, 271.0615<br>MS <sup>3</sup> [955→297]: 176.9829, 269.0453, 253.0504 | MS <sup>2</sup> [955]: 119.0505, 286.0484, 151.0039  | Precarthamin                                                                                                   |
| 162 °C | 15.37 | 10 | [C <sub>44</sub> H <sub>41</sub> O <sub>23</sub> ] <sup>-</sup>  | 937.2055  | 1.2 | 24.5 | MS <sup>2</sup> [937]: 367.0466, 407.0992, 511.0892                                                                                                                       | MS <sup>2</sup> [937]: 119.0504, 287.0558, 136.9881  | (X-Glc-C <sub>2</sub> H <sub>2</sub> O)+(C <sub>18</sub> H <sub>11</sub> O <sub>6</sub> -Glc-CO <sub>2</sub> ) |
| 163 °C | 15.69 | 7  | [C <sub>23</sub> H <sub>17</sub> O <sub>8</sub> ] <sup>-</sup>   | 421.0938  | 2.3 | 15.5 | MS <sup>2</sup> [421]: 275.0562, 257.0456, 377.1031<br>MS <sup>3</sup> [421→275]: 187.0764, 231.0662, 213.0556<br>MS <sup>3</sup> [421→257]: 136.9881, 119.0503           | MS <sup>2</sup> [421]: 119.0503, 136.9881, 271.0611  | X-C <sub>8</sub> H <sub>6</sub> O <sub>2</sub>                                                                 |

<sup>a</sup> The basic frameworks X, Y, and Z, represent the QCG skeletons with the elemental compositions of C<sub>15</sub>H<sub>12</sub>O<sub>6</sub>, C<sub>16</sub>H<sub>12</sub>O<sub>6</sub>, and C<sub>15</sub>H<sub>13</sub>NO<sub>5</sub>, respectively;

<sup>b</sup> identified by comparison with the reference standards;

<sup>c</sup> potential new QCG molecules;

<sup>d</sup> novel dimers containing QCG and FOG.
